# Supplementary material
Source: PubMed Central journal article supplement (PMC6020814)
Supplement: ba018440-suppl1.pdf [file ba018440-suppl1.pdf]

Table S1: Age, sex, disease subtype, IPSS-R risk category, and other clinical details of samples analyzed for TED

| Sl.No. | Sample ID | Unique Patient ID - repeat order | Age <sup>1</sup> | Sex | WHO              | Risk Category <sup>2</sup> | Myeloblast | Ring Sideroblast (%) | Hg (g/dL) | Platelets (10 <sup>9</sup> /L) | ANC (10 <sup>9</sup> /L) | M:E Ratio     | Pro <sup>3</sup>         | EB    | LB    | Poly  | Ortho |
|--------|-----------|----------------------------------|------------------|-----|------------------|----------------------------|------------|----------------------|-----------|--------------------------------|--------------------------|---------------|--------------------------|-------|-------|-------|-------|
| 1      | CUMC-125  | 2-1                              | 75               | M   | RCMD             | N/A                        | 3          | 4                    | No Data   | No Data                        | No Data                  | 1:1           | 2.78                     | 6.50  | 15.50 | 51.50 | 23.73 |
| 2      | CUMC-178  | 2-2                              | 75               | M   | RAEB-1           | Low                        | 7          | No record            | 10.3      | 193                            | 0.84                     | 1:2           | No TED detected (No TED) |       |       |       |       |
| 3      | CUMC-228  | 2-3                              | 76               | M   | RCMD             | Intermediate               | 3          | 6                    | 8.5       | 98                             | 0.13                     | 1:1           | 1.32                     | 3.19  | 10.25 | 48.26 | 36.99 |
| 4      | CUMC-261  | 2-4                              | 76               | M   | RCMD             | Intermediate               | 3          | Not present          | 9         | 188                            | 0.69                     | 1:1           | 0.78                     | 2.01  | 11.38 | 45.68 | 40.16 |
| 5      | CUMC-049  | 3-1                              | 70               | M   | RARS             | Low                        | 1          | 22                   | 7.6       | 154                            | 6.73                     | 1.5:1         | 2.55                     | 5.06  | 10.14 | 26.83 | 55.42 |
| 6      | CUMC-312  | 4-1                              | 72               | M   | MDS/MPN (RARS-T) | N/A                        | 1          | 6/11                 | 9.6       | 534                            | 3.55                     | 4:1           | 3.60                     | 5.57  | 8.25  | 27.27 | 55.30 |
| 7      | CUMC-052  | 5-1                              | 61               | F   | RAEB-2           | Very high                  | 15         | 100                  | 10.4      | 78                             | 0.31                     | 1:2           | 0.70                     | 4.21  | 12.68 | 27.71 | 54.70 |
| 8      | CUMC-110  | 6-1                              | 77               | M   | RCMD             | Intermediate               | 3          | Not present          | 8.7       | 279                            | 0.54                     | 4:1           | No TED detected (No TED) |       |       |       |       |
| 9      | CUMC-251  | 6-2                              | 78               | M   | RCMD             | Low                        | 2          | Not present          | 8.3       | 207                            | 0.61                     | 2:1           | No TED detected (No TED) |       |       |       |       |
| 10     | CUMC-175  | 7-1                              | 77               | F   | RA               | Low                        | 1          | Not present          | 8.1       | 391                            | 3.99                     | 1.5:1         | 7.44                     | 17.18 | 41.00 | 19.02 | 15.35 |
| 11     | CUMC-292  | 7-2                              | 78               | F   | RARS             | Low                        | 1          | 28                   | 7.7       | 331                            | 3.93                     | 2.5:1         | 7.97                     | 12.88 | 9.83  | 38.50 | 30.83 |
| 12     | CUMC-210  | 9-1                              | 66               | M   | RA               | Very low                   | 2          | Not present          | 12        | 204                            | 2.91                     | 1-2:1         | 2.26                     | 7.39  | 13.40 | 36.49 | 40.46 |
| 13     | CUMC-211  | 10-1                             | 82               | M   | RAEB-2           | High                       | 15         | 3                    | 10.7      | 21                             | 1.61                     | 1-2:1         | 0.72                     | 2.02  | 9.95  | 40.03 | 47.28 |
| 14     | CUMC-148  | 11-1                             | 60               | M   | RCMD             | Intermediate               | 1          | 10                   | 6.5       | 10                             | 1.47                     | 2:1           | 3.32                     | 5.05  | 17.03 | 44.98 | 29.22 |
| 15     | CUMC-309  | 12-1                             | 90               | M   | RAEB-1           | Intermediate               | 6          | No record            | 10        | 16                             | 0.71                     |               | 6.90                     | 12.76 | 15.74 | 19.72 | 44.88 |
| 16     | CUMC-144  | 13-1                             | 55               | F   | RCMD-RS          | Low                        | 1          | 50                   | 8.7       | 107                            | 1.88                     | 32:1          | No TED detected (No TED) |       |       |       |       |
| 17     | CUMC-213  | 14-1                             | 72               | M   | RAEB-1           | N/A                        | 6          | 9                    | No Data   | No Data                        | No Data                  | 3:1           | 0.19                     | 1.82  | 14.48 | 37.85 | 45.66 |
| 18     | CUMC-104  | 15-1                             | 69               | F   | RCMD-RS          | Very low                   | 1          | 51                   | 10.6      | 71                             | 1.76                     | 4:1           | 4.23                     | 12.38 | 20.69 | 45.35 | 17.35 |
| 19     | CUMC-071  | 16-1                             | 54               | M   | RCMD             | Intermediate               | <5         | No record            | 8.5       | 139                            | 0.31                     | Not calculate | No TED detected (No TED) |       |       |       |       |
| 20     | CUMC-226  | 16-2                             | 55               | M   | RCMD             | Intermediate               | 1          | Not present          | 6.1       | 74                             | 0.41                     | 1:1           | No TED detected (No TED) |       |       |       |       |
| 21     | CUMC-078  | 17-1                             | 76               | F   | RAEB-1           | Low                        | 5          | 50                   | 12.2      | 243                            | 5.96                     | 1:1           | 1.61                     | 4.12  | 13.89 | 43.38 | 36.99 |
| 22     | CUMC-229  | 17-2                             | 77               | F   | RAEB-2           | High                       | 13         | Inadequate           | 7.9       | 105                            | 0.66                     | 1.2:1         | 0.95                     | 1.33  | 4.47  | 26.61 | 66.63 |
| 23     | CUMC-264  | 17-3                             | 77               | F   | RAEB-2           | AML                        | 10-25      | Not present          | 11.6      | 111                            | 1.88                     | 2.5:1         | No TED detected (No TED) |       |       |       |       |
| 24     | CUMC-305  | 18-1                             | 85               | M   | RCMD             | N/A                        | 3          | Not present          | 9.6       | 65                             | 1.5                      | 2:1           | 1.55                     | 3.42  | 6.51  | 36.94 | 51.59 |
| 25     | CUMC-072  | 19-1                             | 62               | M   | RCMD             | Intermediate               | 1          | 10                   | 9.7       | 121                            | 0.33                     | 1:1           | 2.42                     | 4.10  | 7.95  | 22.59 | 62.95 |
| 26     | CUMC-198  | 19-2                             | 63               | M   | RCMD             | Intermediate               | 1          | Mildly above 15      | 9.6       | 118                            | 0.29                     | 1:1.4         | 2.72                     | 5.46  | 12.03 | 26.13 | 53.66 |
| 27     | CUMC-075  | 20-1                             | 74               | M   | RAEB-1           | Low                        | 9          | Not present          | 10.2      | 169                            | 1.01                     | 1:2           | 3.01                     | 3.54  | 16.87 | 36.85 | 39.74 |

| Sl.No. | Sample ID | Unique Patient ID - repeat order | Age <sup>1</sup> | Sex | WHO              | Risk Category <sup>2</sup> | Myeloblast | Ring Sideroblast (%)        | Hg (g/dL) | Platelets (10 <sup>9</sup> /L) | ANC (10 <sup>9</sup> /L) | M:E Ratio | Pro <sup>3</sup>         | EB    | LB    | Poly  | Ortho |
|--------|-----------|----------------------------------|------------------|-----|------------------|----------------------------|------------|-----------------------------|-----------|--------------------------------|--------------------------|-----------|--------------------------|-------|-------|-------|-------|
| 28     | CUMC-233  | 21-1                             | 83               | M   | RARS             | Very low                   | 1          | 80                          | 10.2      | 280                            | 0.93                     | 1.4:1     | 1.01                     | 1.74  | 5.36  | 25.71 | 66.18 |
| 29     | CUMC-044  | 22-1                             | 75               | F   | RCMD             | Intermediate               | 4          | Not present                 | 13        | 63                             | 0.7                      | 1:1       | 1.84                     | 3.93  | 16.82 | 49.88 | 27.54 |
| 30     | CUMC-139  | 22-2                             | 75               | F   | RCMD             | Intermediate               | 1          | No record                   | 12.3      | 50                             | 1.01                     | 1:2       | No TED detected (No TED) |       |       |       |       |
| 31     | CUMC-086  | 24-1                             | 69               | M   | RCMD             | Very low                   | 0          | 6                           | 12.5      | 88                             | 3.17                     | 3:1       | 1.85                     | 6.54  | 20.93 | 47.50 | 23.18 |
| 32     | CUMC-224  | 24-2                             | 70               | M   | RCMD             | Intermediate               | 3          | 10                          | 14.8      | 64                             | 2.32                     | 2:1       | 1.40                     | 2.84  | 14.42 | 40.37 | 40.96 |
| 33     | CUMC-094  | 25-1                             | 50               | F   | RAEB-1           | Very high                  | 9          | 12                          | 11        | 60                             | 0.2                      | 2:1       | 0.10                     | 1.56  | 10.34 | 71.20 | 16.81 |
| 34     | CUMC-093  | 26-1                             | 79               | M   | RCMD             | Low                        | 1          | 7                           | 9.6       | 86                             | 2.69                     | 9:1       | 2.88                     | 5.84  | 14.70 | 38.01 | 38.57 |
| 35     | CUMC-040  | 27-1                             | 78               | F   | RAEB-1           | High                       | 8          | 9                           | 9         | 38                             | 1.25                     | 5:1       | 3.86                     | 5.81  | 11.91 | 25.34 | 53.07 |
| 36     | CUMC-064  | 27-2                             | 78               | F   | RAEB-2           | Very high                  | 12         | 15                          | 8.4       | 76                             | 3.5                      | 3:1       | 0.72                     | 2.92  | 13.62 | 32.15 | 50.60 |
| 37     | CUMC-249  | 28-1                             | 79               | M   | RCMD-RS          | Low                        | 2          | 61                          | 9.7       | 207                            | 1.19                     | 1:2       | 1.85                     | 2.03  | 6.35  | 30.36 | 59.40 |
| 38     | CUMC-284  | 31-1                             | 60               | F   | RCMD             | Intermediate               | 1          | Present but unable to count | 10.7      | 167                            | 1.27                     | 2:1       | No TED detected (No TED) |       |       |       |       |
| 39     | CUMC-174  | 32-1                             | 82               | M   | RAEB-2           | Intermediate               | 16         | Not present                 | 13.1      | 117                            | 0.67                     | 3.5:1     | 1.78                     | 2.72  | 17.26 | 52.04 | 26.20 |
| 40     | CUMC-202  | 32-2                             | 82               | M   | RAEB-2           | Intermediate               | 15         | Not present                 | 12.3      | 106                            | 0.91                     | 1.5:1     | 1.80                     | 3.52  | 9.64  | 33.10 | 51.95 |
| 41     | CUMC-230  | 32-3                             | 82               | M   | RAEB-2           | High                       | 16         | Not present                 | 11.9      | 93                             | 0.49                     | 1:1.2     | 1.17                     | 3.24  | 4.94  | 21.53 | 69.11 |
| 42     | CUMC-053  | 34-1                             | 87               | M   | RCMD             | Low                        | 1          | Not present                 | 10.4      | 9                              | 2.14                     | 2:1       | 3.65                     | 8.16  | 14.86 | 25.49 | 47.84 |
| 43     | CUMC-156  | 34-2                             | 88               | M   | RCMD             | Low                        | 1          | Not present                 | 9.9       | 12                             | 3.52                     | 2.75:1    | 1.78                     | 4.58  | 14.07 | 31.52 | 48.05 |
| 44     | CUMC-115  | 35-1                             | 76               | F   | RAEB-2           | Low                        | 10         | 20                          | 10.4      | 137                            | 1.33                     | 1:2       | 0.86                     | 1.59  | 8.94  | 32.42 | 56.19 |
| 45     | CUMC-165  | 35-2                             | 77               | F   | RAEB-2           | Intermediate               | 10         | 25                          | 8.4       | 200                            | 4.79                     | 4:1       | No TED detected (No TED) |       |       |       |       |
| 46     | CUMC-214  | 35-3                             | 77               | F   | RAEB-1           | Intermediate               | 9          | >15                         | 8.8       | 166                            | 7.84                     | >5:1      | 1.38                     | 2.34  | 9.79  | 38.61 | 47.88 |
| 47     | CUMC-262  | 35-4                             | 78               | F   | RAEB-1           | N/A                        | 5          | No record                   | 7.7       | 174                            | No Data                  | >10:1     | 0.41                     | 0.82  | 5.32  | 29.73 | 63.73 |
| 48     | CUMC-154  | 36-1                             | 74               | M   | RAEB-1           | High                       | 6          | 40                          | 8.9       | 37                             | 0.66                     | 1:5       | 4.17                     | 10.74 | 19.19 | 41.24 | 24.66 |
| 49     | CUMC-171  | 36-2                             | 74               | M   | RARS             | Intermediate               | 4          | 80                          | 9.4       | 25                             | 0.76                     | 1:3       | 2.22                     | 3.33  | 16.51 | 42.32 | 35.63 |
| 50     | CUMC-218  | 36-3                             | 74               | M   | RCMD             | Low                        | 2          | Not present                 | 8.7       | 33                             | 1.88                     | 1.5:1     | 2.17                     | 8.53  | 28.95 | 39.41 | 20.94 |
| 51     | CUMC-103  | 37-1                             | 83               | F   | RCMD-RS          | Very high                  | 3          | 15                          | 9.1       | 62                             | 1.95                     | 5:1       | No TED detected (No TED) |       |       |       |       |
| 52     | CUMC-151  | 37-2                             | 84               | F   | RCMD-RS          | Very high                  | 4          | 95                          | 7.8       | 50                             | 1.45                     | 2.5:1     | No TED detected (No TED) |       |       |       |       |
| 53     | CUMC-167  | 38-1                             | 84               | F   | MDS/MPN (RARS-T) | N/A                        | 1          | 85                          | 9.3       | 614                            | 6.95                     | 1.5:1     | 2.00                     | 3.65  | 7.99  | 27.58 | 58.78 |
| 54     | CUMC-186  | 38-2                             | 85               | F   | MDS/MPN (RARS-T) | Low                        | 1          | 68                          | 8.9       | 586                            | 4.9                      | 1:1       | 3.56                     | 6.01  | 15.11 | 29.57 | 45.74 |
| 55     | CUMC-215  | 38-3                             | 85               | F   | MDS/MPN (RARS-T) | Low                        | 2          | 96                          | 9.6       | 505                            | 4.49                     | 1:1       | 2.35                     | 3.78  | 12.85 | 27.04 | 53.98 |

| Sl.No. | Sample ID | Unique Patient ID - repeat order | Age <sup>1</sup> | Sex | WHO     | Risk Category <sup>2</sup> | Myeloblast | Ring Sideroblast (%) | Hg (g/dL) | Platelets (10 <sup>9</sup> /L) | ANC (10 <sup>9</sup> /L) | M:E Ratio     | Pro <sup>3</sup>         | EB    | LB    | Poly  | Ortho |
|--------|-----------|----------------------------------|------------------|-----|---------|----------------------------|------------|----------------------|-----------|--------------------------------|--------------------------|---------------|--------------------------|-------|-------|-------|-------|
| 56     | CUMC-157  | 39-1                             | 95               | F   | RCMD-RS | Low                        | 3          | 35                   | 8.7       | 230                            | 3.28                     | 2:1           | 0.40                     | 2.27  | 13.48 | 53.28 | 30.56 |
| 57     | CUMC-318  | 40-1                             | 66               | F   | RAEB-2  | N/A                        | No Info    | Not present          | 8.6       | 179                            | 0.2                      | not calculate | No TED detected (No TED) |       |       |       |       |
| 58     | CUMC-301  | 41-1                             | 78               | M   | RAEB-2  | High                       | 11         | Not present          | 9.6       | 38                             | 5.05                     | >5:1          | No TED detected (No TED) |       |       |       |       |
| 59     | CUMC-313  | 41-2                             | 78               | M   | RAEB-1  | High                       | 9          | Not present          | 8.7       | 13                             | 0.38                     | 7:1           | No TED detected (No TED) |       |       |       |       |
| 60     | CUMC-276  | 42-1                             | 64               | M   | RCUD-RN | N/A                        | 1          | Not present          | 14.9      | 170                            | No Data                  | 2.8:1         | 1.85                     | 4.97  | 12.17 | 48.52 | 32.50 |
| 61     | CUMC-140  | 43-1                             | 71               | M   | RCMD    | Low                        | <5         | Not present          | 10.7      | 11                             | 2.4                      | 2:1           | No TED detected (No TED) |       |       |       |       |
| 62     | CUMC-236  | 43-2                             | 72               | M   | RCMD-RS | Intermediate               | 4          | 20                   | 10.6      | 9                              | 2.2                      | 1:2           | No TED detected (No TED) |       |       |       |       |
| 63     | CUMC-098  | 45-1                             | 52               | M   | RCMD    | Very low                   | 1          | Not present          | 15.7      | 254                            | 0.85                     | 1:1           | 2.68                     | 5.76  | 11.70 | 26.75 | 53.11 |
| 64     | CUMC-290  | 45-2                             | 53               | M   | RCMD    | Very low                   | 1-2        | Not present          | 19.4      | 291                            | 1.38                     | 1:1           | 5.83                     | 11.13 | 19.29 | 49.56 | 14.19 |
| 65     | CUMC-285  | 46-1                             | 71               | M   | RCMD    | N/A                        | 1          | Not present          | 10.6      | 285                            | No Data                  | 3.5:1         | No TED detected (No TED) |       |       |       |       |
| 66     | CUMC-162  | 47-1                             | 75               | M   | RCMD    | Intermediate               | 4          | 1                    | 10.2      | 28                             | 4.83                     | 5:1           | 1.28                     | 2.18  | 17.38 | 24.85 | 54.36 |
| 67     | CUMC-179  | 47-2                             | 75               | M   | RCMD    | Intermediate               | 3          | 5                    | 10        | 44                             | 15.99                    | 50:1          | 2.76                     | 4.81  | 12.53 | 59.80 | 22.86 |
| 68     | CUMC-111  | 48-1                             | 76               | M   | RARS    | Low                        | 1          | 95                   | 8.4       | 303                            | 2.22                     | 2:1           | 3.70                     | 7.49  | 10.45 | 25.68 | 52.67 |
| 69     | CUMC-283  | 48-2                             | 77               | M   | RARS    | N/A                        | 1          | 50                   | 8.8       | 350                            | No Data                  | 3.6:1         | 3.56                     | 6.78  | 10.61 | 46.93 | 32.12 |
| 70     | CUMC-113  | 49-1                             | 68               | F   | RCMD    | N/A                        | No Info    | No record            | 11.8      | 443                            | 3.56                     | not calculate | No TED detected (No TED) |       |       |       |       |
| 71     | CUMC-170  | 49-2                             | 68               | F   | RCMD    | Intermediate               | 4.5        | Not present          | 7.1       | 152                            | 0.72                     | 5:1           | No TED detected (No TED) |       |       |       |       |
| 72     | CUMC-073  | 50-1                             | 78               | M   | RCMD    | Low                        | 0          | Not present          | 9.8       | 11                             | 1.83                     | 1:1           | 2.06                     | 2.20  | 6.23  | 33.45 | 56.06 |
| 73     | CUMC-149  | 51-1                             | 73               | M   | RAEB-1  | Intermediate               | 6          | 100                  | 9.7       | 281                            | 2.25                     | 1:1           | 1.10                     | 2.14  | 10.65 | 28.22 | 57.89 |
| 74     | CUMC-188  | 51-2                             | 73               | M   | RAEB-2  | High                       | 15         | >15                  | 8.3       | 224                            | 1.78                     | 1-2:1         | 1.55                     | 2.47  | 15.34 | 33.95 | 46.70 |
| 75     | CUMC-240  | 51-3                             | 74               | M   | RCMD-RS | Low                        | 2          | >15                  | 8.5       | 43                             | 0.91                     | 3.5:1         | No TED detected (No TED) |       |       |       |       |
| 76     | CUMC-267  | 51-4                             | 74               | M   | RAEB-1  | N/A                        | 10         | 50                   | 9.4       | 16                             | No Data                  | Increased     | 1.22                     | 2.74  | 8.04  | 28.60 | 59.41 |
| 77     | CUMC-287  | 51-5                             | 74               | M   | RAEB-2  | N/A                        | No Info    | Unable to asses      | 8.6       | 30                             | No Data                  | not calculate | 3.47                     | 4.53  | 9.26  | 30.32 | 52.42 |
| 78     | CUMC-081  | 52-1                             | 50               | F   | RCMD    | Very low                   | 1          | 50                   | 14.2      | 61                             | 3.55                     | 2-3:1         | 3.37                     | 6.94  | 13.39 | 50.74 | 25.55 |
| 79     | CUMC-106  | 54-1                             | 73               | M   | RCMD-RS | Low                        | 1          | 85                   | 9.1       | 189                            | 1.71                     | 1:1-1.5       | 3.08                     | 9.36  | 12.97 | 26.71 | 47.88 |
| 80     | CUMC-243  | 54-2                             | 74               | M   | RCMD-RS | Low                        | 1          | 70                   | 8.3       | 171                            | 0.86                     | 1:1           | 3.27                     | 5.66  | 15.02 | 29.43 | 46.61 |
| 81     | CUMC-056  | 55-1                             | 79               | F   | RARS    | Low                        | 0          | 80                   | 7.9       | 237                            | 5.31                     | 1:1           | 2.89                     | 2.81  | 12.62 | 34.18 | 53.20 |
| 82     | CUMC-067  | 55-2                             | 80               | F   | RARS    | Very low                   | 1          | 90                   | 11.6      | 201                            | 3.6                      | 2:1           | 6.18                     | 6.72  | 12.74 | 38.69 | 35.67 |
| 83     | CUMC-147  | 55-3                             | 80               | F   | RARS    | Low                        | 0          | 80                   | 9.8       | 164                            | 2.69                     | 4:1           | 0.56                     | 2.24  | 9.35  | 31.97 | 55.87 |

| Sl.No. | Sample ID | Unique Patient ID - repeat order | Age <sup>1</sup> | Sex | WHO     | Risk Category <sup>2</sup> | Myeloblast | Ring Sideroblast (%) | Hg (g/dL) | Platelets (10 <sup>9</sup> /L) | ANC (10 <sup>9</sup> /L) | M:E Ratio                | Pro <sup>3</sup>         | EB    | LB    | Poly  | Ortho |
|--------|-----------|----------------------------------|------------------|-----|---------|----------------------------|------------|----------------------|-----------|--------------------------------|--------------------------|--------------------------|--------------------------|-------|-------|-------|-------|
| 84     | CUMC-266  | 55-4                             | 81               | F   | RARS    | Low                        | 1          | 80                   | 9.2       | 191                            | 2.26                     | 1.5:1                    | 2.59                     | 2.63  | 10.75 | 32.66 | 51.37 |
| 85     | CUMC-316  | 56-1                             | 71               | F   | RCMD    | N/A                        | 2          | Not present          | No Data   | No Data                        | No Data                  | 2:1                      | 3.53                     | 5.44  | 6.36  | 47.53 | 37.14 |
| 86     | CUMC-070  | 57-1                             | 74               | F   | RAEB-1  | Intermediate               | 7          | Not present          | 9.5       | 180                            | 0.31                     | 3:1                      | No TED detected (No TED) |       |       |       |       |
| 87     | CUMC-181  | 57-2                             | 75               | F   | RAEB-2  | High                       | 13         | Not present          | 11.2      | 14                             | 0.07                     | 59:1                     | No TED detected (No TED) |       |       |       |       |
| 88     | CUMC-176  | 58-1                             | 67               | M   | RAEB-2  | Intermediate               | 10         | 72                   | 9.3       | 145                            | 4.56                     | 2:1                      | 1.17                     | 2.88  | 15.23 | 36.89 | 43.82 |
| 89     | CUMC-231  | 58-2                             | 67               | M   | RAEB-2  | High                       | 14         | 60                   | 7.2       | 94                             | 1.81                     | 1.8:1                    | 0.85                     | 1.88  | 7.25  | 26.97 | 63.06 |
| 90     | CUMC-255  | 58-3                             | 67               | M   | RAEB-2  | Intermediate               | 10         | 75                   | 9.8       | 217                            | 1.77                     | 1:1                      | 0.46                     | 0.92  | 3.41  | 31.47 | 63.74 |
| 91     | CUMC-288  | 58-4                             | 68               | M   | RARS    | Very low                   | 2          | 35                   | 12.7      | 281                            | 4.17                     | 1:1                      | 2.11                     | 4.49  | 10.82 | 37.47 | 45.12 |
| 92     | CUMC-046  | 59-1                             | 66               | F   | RCMD-RS | Very low                   | 1          | 85                   | 10.1      | 280                            | 4.88                     | 1:1                      | 2.52                     | 3.65  | 21.75 | 27.49 | 44.59 |
| 93     | CUMC-054  | 59-2                             | 66               | F   | RCMD-RS | Very low                   | 1          | 100                  | 10.2      | 368                            | 6.09                     | 2:1                      | No TED detected (No TED) |       |       |       |       |
| 94     | CUMC-069  | 59-3                             | 66               | F   | RCMD-RS | Low                        | 2          | 90                   | 8.4       | 222                            | 3.36                     | 1:2                      | 2.30                     | 3.59  | 11.11 | 26.88 | 56.12 |
| 95     | CUMC-100  | 59-4                             | 66               | F   | RAEB-1  | Intermediate               | 5          | 82                   | 8         | 183                            | 3.66                     | 2:1                      | 2.50                     | 5.57  | 12.25 | 24.17 | 55.51 |
| 96     | CUMC-158  | 59-5                             | 67               | F   | RARS    | Intermediate               | 1          | 16                   | 8.7       | 69                             | 2.83                     | 11:1                     | 1.80                     | 1.55  | 12.07 | 34.22 | 50.36 |
| 97     | CUMC-269  | 60-1                             | 72               | M   | RCMD-RS | Intermediate               | 2          | 20                   | 8.5       | 95                             | 1.29                     | 1.3:1                    | No TED detected (No TED) |       |       |       |       |
| 98     | CUMC-306  | 60-2                             | 72               | M   | RAEB-2  | Very high                  | 13         | Not present          | 8.1       | 23                             | 0.33                     | Notedly incre:           | No TED detected (No TED) |       |       |       |       |
| 99     | CUMC-065  | 61-1                             | 61               | M   | RARS    | Low                        | 1          | 90                   | 9.6       | 422                            | 4.33                     | 1:1                      | 2.43                     | 5.98  | 16.70 | 37.44 | 37.44 |
| 100    | CUMC-307  | 61-2                             | 63               | M   | RA      | Very low                   | 1          | 10                   | 12.1      | 249                            | 2.14                     | 1:1                      | 4.21                     | 5.71  | 9.08  | 50.94 | 30.06 |
| 101    | CUMC-295  | 62-1                             | 67               | M   | RA      | Low                        | 1          | Not present          | 8.8       | 406                            | 3.45                     | No TED detected (No TED) |                          |       |       |       |       |
| 102    | CUMC-185  | 63-1                             | 82               | F   | RARS    | Very low                   | 0          | 80                   | 8         | 301                            | 3.73                     | 1:2                      | 1.80                     | 4.10  | 20.44 | 31.85 | 41.82 |
| 103    | CUMC-090  | 65-1                             | 73               | M   | RARS    | Very low                   | 0          | 65                   | 11.7      | 176                            | 2.39                     | 1.5:1                    | 3.21                     | 5.63  | 11.66 | 25.67 | 53.83 |
| 104    | CUMC-238  | 65-2                             | 74               | M   | RCMD-RS | Very low                   | 0          | 65                   | 10.4      | 190                            | 1.82                     | 1:1                      | 1.11                     | 2.16  | 4.87  | 25.00 | 66.85 |
| 105    | CUMC-135  | 66-1                             | 76               | M   | RCMD    | N/A                        | 1          | Not present          | No Data   | No Data                        | No Data                  | 1.1:1                    | No TED detected (No TED) |       |       |       |       |
| 106    | CUMC-220  | 66-2                             | 77               | M   | RCMD    | Intermediate               | 2          | Not present          | 9.2       | 171                            | 0.66                     | 1:1.5                    | No TED detected (No TED) |       |       |       |       |
| 107    | CUMC-112  | 67-1                             | 67               | M   | RCMD    | Intermediate               | 5          | 3                    | 6.4       | 123                            | 0.84                     | 5:1                      | 0.62                     | 2.33  | 13.00 | 39.83 | 44.23 |
| 108    | CUMC-195  | 67-2                             | 68               | M   | RAEB-2  | Very high                  | 11         | 3                    | 7.8       | 123                            | 1.14                     | 3.2:1                    | No TED detected (No TED) |       |       |       |       |
| 109    | CUMC-066  | 69-1                             | 73               | F   | RARS    | Low                        | 1          | 65                   | 9.7       | 255                            | 4.2                      | 3:1                      | 12.88                    | 12.93 | 14.58 | 31.01 | 28.61 |
| 110    | CUMC-271  | 69-2                             | 75               | F   | RCMD-RS | Low                        | 3          | 14                   | 9.6       | 125                            | 1.85                     | 3.5:1                    | 0.98                     | 3.15  | 6.34  | 40.61 | 48.92 |
| 111    | CUMC-085  | 70-1                             | 70               | M   | RCMD    | High                       | 1          | 5                    | 11.9      | 98                             | 0.68                     | 1.5:1                    | 1.45                     | 2.19  | 6.73  | 60.97 | 28.66 |

| Sl.No. | Sample ID | Unique Patient ID - repeat order | Age <sup>1</sup> | Sex | WHO              | Risk Category <sup>2</sup> | Myeloblast | Ring Sideroblast (%) | Hg (g/dL) | Platelets (10 <sup>9</sup> /L) | ANC (10 <sup>9</sup> /L) | M:E Ratio     | Pro <sup>3</sup>         | EB    | LB    | Poly  | Ortho |
|--------|-----------|----------------------------------|------------------|-----|------------------|----------------------------|------------|----------------------|-----------|--------------------------------|--------------------------|---------------|--------------------------|-------|-------|-------|-------|
| 112    | CUMC-241  | 70-2                             | 72               | M   | RCMD             | Low                        | 2          | Not present          | 12.3      | 60                             | 0.56                     | 1.4:1         | 0.92                     | 1.33  | 4.20  | 29.05 | 64.50 |
| 113    | CUMC-273  | 70-3                             | 72               | M   | RCMD             | Intermediate               | 3          | Not present          | 12.3      | 54                             | 5.46                     | 2:1           | No TED detected (No TED) |       |       |       |       |
| 114    | CUMC-095  | 71-1                             | 83               | F   | RA               | Very low                   | 0          | Not present          | 10.6      | 184                            | 4.84                     | 2.5:1         | 3.87                     | 6.83  | 12.36 | 24.92 | 52.03 |
| 115    | CUMC-227  | 71-2                             | 84               | F   | RA               | Low                        | 0          | Not present          | 9.5       | 243                            | 4.74                     | 3:2           | No TED detected (No TED) |       |       |       |       |
| 116    | CUMC-289  | 71-3                             | 84               | F   | RA               | Very low                   | 0          | Not present          | 11.5      | 236                            | 3.49                     | 2:1           | No TED detected (No TED) |       |       |       |       |
| 117    | CUMC-057  | 72-1                             | 80               | F   | RAEB-2           | High                       | 14         | Not present          | 9.9       | 122                            | 0.68                     | 1.5:1         | 2.83                     | 4.93  | 19.71 | 42.22 | 30.31 |
| 118    | CUMC-153  | 72-3                             | 80               | F   | RAEB-2           | Very high                  | 19         | 7                    | 8.4       | 132                            | 0.17                     | 1.3:1         | 0.40                     | 2.41  | 18.24 | 41.52 | 37.43 |
| 119    | CUMC-275  | 72-5                             | 81               | F   | RAEB-2           | N/A                        | 19         | Inadequate           | 7.7       | 90                             | No Data                  | 1:1           | No TED detected (No TED) |       |       |       |       |
| 120    | CUMC-092  | 73-1                             | 82               | M   | RCMD-RS          | Very low                   | 1          | 40                   | 9         | 167                            | 0.81                     | 1:1-2         | 2.35                     | 4.59  | 10.51 | 29.81 | 52.74 |
| 121    | CUMC-253  | 73-2                             | 84               | M   | RCMD-RS          | Very low                   | 2          | 50                   | 11.3      | 170                            | 1.62                     | 1:1           | 1.27                     | 1.73  | 9.67  | 26.49 | 60.84 |
| 122    | CUMC-108  | 74-1                             | 64               | M   | RA               | Very low                   | 0          | Not present          | 13.9      | 178                            | 2.55                     | 2:1           | 1.67                     | 4.77  | 9.16  | 26.51 | 57.89 |
| 123    | CUMC-256  | 74-2                             | 66               | M   | RA               | Very low                   | 1          | Not present          | 13.2      | 177                            | 2.45                     | 2:1           | 2.19                     | 3.36  | 13.23 | 38.27 | 42.94 |
| 124    | CUMC-068  | 75-1                             | 74               | F   | RCMD-RS          | Very low                   | 1          | 80                   | 11.8      | 289                            | 3.33                     | 2-1:1         | 7.40                     | 17.05 | 28.08 | 22.90 | 24.57 |
| 125    | CUMC-234  | 75-2                             | 76               | F   | RCMD-RS          | Low                        | 1          | 45                   | 9.2       | 239                            | 1.92                     | 2.3:1         | 2.13                     | 3.85  | 8.14  | 25.15 | 60.73 |
| 126    | CUMC-270  | 76-1                             | 81               | M   | RAEB-1           | N/A                        | 6          | 30                   | 8.6       | 208                            | No Data                  | 1:2           | No TED detected (No TED) |       |       |       |       |
| 127    | CUMC-302  | 77-1                             | 82               | M   | RAEB-1           | Very high                  | 7          | Not present          | 8.7       | 73                             | 0.39                     | 2:1           | 1.45                     | 4.70  | 6.91  | 38.62 | 48.33 |
| 128    | CUMC-105  | 78-1                             | 60               | M   | RCMD             | Very low                   | 1          | Not present          | 15.2      | 81                             | 1.32                     | 1.5:1         | 2.65                     | 7.75  | 15.98 | 51.22 | 22.40 |
| 129    | CUMC-159  | 79-1                             | 82               | M   | RCMD             | Low                        | 4          | Not present          | 11.1      | 232                            | 3.58                     | 2:1           | 1.79                     | 5.92  | 23.57 | 40.96 | 27.75 |
| 130    | CUMC-247  | 79-2                             | 83               | M   | RCMD             | Low                        | <5         | No information       | 9.4       | 162                            | 2.98                     |               | No TED detected (No TED) |       |       |       |       |
| 131    | CUMC-263  | 79-3                             | 83               | M   | RCMD             | N/A                        | <5         | No information       | 8.8       | 69                             | No Data                  |               | No TED detected (No TED) |       |       |       |       |
| 132    | CUMC-177  | 80-1                             | 79               | F   | MDS/MPN (RARS-T) | N/A                        | 1          | 90                   | 6.9       | 494                            | 2                        | 1:2.9         | No TED detected (No TED) |       |       |       |       |
| 133    | CUMC-299  | 80-2                             | 80               | F   | MDS/MPN (RARS-T) | Intermediate               | <5         | 80                   | 7.2       | 452                            | 2.66                     |               | No TED detected (No TED) |       |       |       |       |
| 134    | CUMC-155  | 81-1                             | 74               | M   | RAEB-1           | Very high                  | 6          | 1                    | 8.1       | 31                             | 0.58                     | 2:1           | 0.36                     | 4.91  | 22.72 | 37.16 | 34.85 |
| 135    | CUMC-225  | 81-2                             | 75               | M   | RCMD             | Intermediate               | 4          | 8                    | 8.7       | 58                             | 1.89                     | 1:3-4         | 1.84                     | 3.39  | 9.26  | 43.91 | 41.61 |
| 136    | CUMC-130  | 82-1                             | 72               | F   | RCMD-RS          | N/A                        | 4          | 54                   | 7.7       | 46                             | No Data                  | 1-2:1         | 3.92                     | 3.76  | 10.31 | 26.97 | 55.04 |
| 137    | CUMC-122  | 83-1                             | 79               | M   | RCMD-RS          | Intermediate               | 1          | 15                   | 9.7       | 40                             | 2.6                      | 1.5:1         | 2.95                     | 4.89  | 20.10 | 45.08 | 26.98 |
| 138    | CUMC-083  | 84-1                             | 74               | M   | RARS             | N/A                        | 4          | 50                   | 8         | 451                            | No Data                  | not calculate | 3.05                     | 7.20  | 19.67 | 29.89 | 40.18 |
| 139    | CUMC-216  | 84-2                             | 82               | M   | RCMD-RS          | Low                        | 0          | 50                   | 12.3      | 79                             | 0.78                     | 1.5:1         | 3.44                     | 8.13  | 16.42 | 39.31 | 32.69 |

| Sl.No. | Sample ID | Unique Patient ID - repeat order | Age <sup>1</sup> | Sex | WHO              | Risk Category <sup>2</sup> | Myeloblast | Ring Sideroblast (%) | Hg (g/dL) | Platelets (10 <sup>9</sup> /L) | ANC (10 <sup>9</sup> /L) | M:E Ratio     | Pro <sup>3</sup>         | EB    | LB    | Poly  | Ortho |
|--------|-----------|----------------------------------|------------------|-----|------------------|----------------------------|------------|----------------------|-----------|--------------------------------|--------------------------|---------------|--------------------------|-------|-------|-------|-------|
| 140    | CUMC-250  | 84-3                             | 76               | M   | RCMD-RS          | Low                        | 3          | 30                   | 12.2      | 145                            | 1                        | 1:1           | 1.83                     | 2.94  | 9.75  | 32.55 | 52.94 |
| 141    | CUMC-203  | 86-1                             | 72               | M   | RCMD             | Intermediate               | 2          | 9                    | 12.8      | 70                             | 5.03                     | 1:1.3         | 5.05                     | 14.75 | 24.56 | 31.85 | 23.79 |
| 142    | CUMC-132  | 88-1                             | 72               | F   | RCMD             | Very low                   | 1          | Not present          | 13        | 86                             | 1.43                     | 1-2:1         | 0.99                     | 2.34  | 14.35 | 41.56 | 40.76 |
| 143    | CUMC-145  | 89-1                             | 65               | F   | RCMD             | High                       | 4          | Not present          | 10.4      | 126                            | 1.96                     | 1:3           | 1.09                     | 2.70  | 9.38  | 27.18 | 59.66 |
| 144    | CUMC-217  | 89-2                             | 65               | F   | RCMD-RS          | Very high                  | 2          | 70                   | 7.8       | 94                             | 0.36                     | <1:10         | 0.34                     | 1.03  | 12.84 | 41.84 | 43.94 |
| 145    | CUMC-254  | 89-3                             | 65               | F   | RAEB-2           | Very high                  | 11         | 7                    | 8.8       | 26                             | 0.03                     | 1:5           | 0.19                     | 0.47  | 4.25  | 28.69 | 66.40 |
| 146    | CUMC-050  | 90-1                             | 62               | M   | RA               | Low                        | 1          | Not present          | 13.1      | 47                             | 1.29                     | 1.5:1         | 3.58                     | 7.51  | 17.75 | 54.86 | 16.30 |
| 147    | CUMC-183  | 90-2                             | 64               | M   | RA               | Low                        | 2          | No record            | 10.2      | 70                             | 0.73                     | 1/1-2         | 2.85                     | 6.40  | 16.78 | 45.86 | 28.11 |
| 148    | CUMC-314  | 90-3                             | 65               | M   | RCMD             | Intermediate               | 1          | Not present          | 9.4       | 30                             | 0.41                     | 1.5:1         | 1.41                     | 3.13  | 8.17  | 38.75 | 48.54 |
| 149    | CUMC-252  | 91-1                             | 66               | F   | RCMD             | Low                        | 1          | Not present          | 11.8      | 36                             | 1.03                     | 3:1           | 0.69                     | 2.69  | 5.37  | 36.13 | 55.12 |
| 150    | CUMC-173  | 92-1                             | 78               | M   | RAEB-2           | Very high                  | 18         | Not present          | 7.9       | 35                             | 2.85                     | 7:1           | No TED detected (No TED) |       |       |       |       |
| 151    | CUMC-308  | 93-1                             | 74               | M   | RCMD-RS          | Low                        | 2          | 90                   | 5.1       | 98                             | 1.68                     | 1.5:1         | 9.35                     | 15.97 | 21.28 | 23.30 | 30.10 |
| 152    | CUMC-055  | 95-1                             | 70               | M   | RCMD-RS          | Low                        | 4          | 65                   | 8.8       | 324                            | 2.23                     | 2-3:1         | 2.06                     | 5.95  | 19.10 | 40.52 | 32.36 |
| 153    | CUMC-079  | 95-2                             | 70               | M   | RCMD-RS          | Low                        | 4          | 95                   | 8.5       | 350                            | 4.83                     | 1.5:1         | 2.05                     | 6.74  | 18.96 | 34.18 | 38.06 |
| 154    | CUMC-205  | 95-3                             | 71               | M   | RCMD-RS          | Low                        | 3          | 19                   | 11.3      | 256                            | 11.65                    | 2.7:1         | 2.43                     | 6.56  | 19.78 | 43.35 | 27.88 |
| 155    | CUMC-260  | 95-4                             | 71               | M   | RARS             | Very low                   | 2          | 9                    | 10.3      | 254                            | 4.57                     | 3:1           | 1.62                     | 3.28  | 11.72 | 30.45 | 52.92 |
| 156    | CUMC-109  | 97-1                             | 66               | F   | MDS/MPN (RARS-T) | N/A                        | 3          | 50                   | 9         | 781                            | 1.2                      | 1:1           | 2.13                     | 3.88  | 17.25 | 31.59 | 51.17 |
| 157    | CUMC-258  | 97-2                             | 68               | F   | RARS             | N/A                        | No Info    | Unable to asses      | 6.4       | 241                            | 0.84                     | Not calculate | No TED detected (No TED) |       |       |       |       |
| 158    | CUMC-045  | 98-1                             | 37               | F   | RCMD             | Low                        | 0          | Not present          | 10.4      | 42                             | 1.83                     | 1.5:1         | 0.79                     | 1.95  | 9.09  | 36.42 | 51.75 |
| 159    | CUMC-248  | 99-1                             | 67               | M   | RCMD             | Low                        | 1          | Not present          | 14.4      | 25                             | 0.54                     | 2:1           | 1.88                     | 5.36  | 18.66 | 44.27 | 29.84 |
| 160    | CUMC-116  | 100-1                            | 86               | M   | RCMD             | Low                        | 1          | Not present          | 8.4       | 137                            | 1.46                     | 20:1          | 0.19                     | 0.47  | 6.02  | 33.17 | 60.19 |
| 161    | CUMC-150  | 100-2                            | 86               | M   | RCMD             | Low                        | 1          | Not present          | 6.9       | 127                            | 1.48                     | 105:1         | No TED detected (No TED) |       |       |       |       |
| 162    | CUMC-197  | 100-3                            | 87               | M   | RCMD             | Low                        | 0          | No record            | 7.9       | 159                            | 1.77                     | >5:1          | 1.32                     | 1.76  | 6.08  | 31.30 | 59.54 |
| 163    | CUMC-223  | 100-4                            | 87               | M   | RCMD             | Intermediate               | <5         | No record            | 7.5       | 110                            | 1.61                     | >10:1         | No TED detected (No TED) |       |       |       |       |
| 164    | CUMC-237  | 100-5                            | 87               | M   | RCMD             | Intermediate               | 3          | No record            | 6         | 188                            | 2.08                     | 20:1          | No TED detected (No TED) |       |       |       |       |
| 165    | CUMC-296  | 100-6                            | 88               | M   | RCMD             | Low                        | 2          | Not present          | 8.4       | 182                            | 1.85                     | >10:1         | No TED detected (No TED) |       |       |       |       |
| 166    | CUMC-060  | 101-1                            | 59               | F   | RA               | Very low                   | 0          | Not present          | 10.8      | 59                             | 0.8                      | 1:2           | No TED detected (No TED) |       |       |       |       |
| 167    | CUMC-190  | 101-2                            | 60               | F   | RA               | Very low                   | 1          | Not present          | 12.7      | 122                            | 1.63                     | 1:1           | 0.12                     | 5.15  | 15.26 | 49.91 | 29.57 |

| Sl.No. | Sample ID | Unique Patient ID - repeat order | Age <sup>1</sup> | Sex | WHO              | Risk Category <sup>2</sup> | Myeloblast | Ring Sideroblast (%)      | Hg (g/dL) | Platelets (10 <sup>9</sup> /L) | ANC (10 <sup>9</sup> /L) | M:E Ratio                | Pro <sup>3</sup>         | EB    | LB    | Poly  | Ortho |
|--------|-----------|----------------------------------|------------------|-----|------------------|----------------------------|------------|---------------------------|-----------|--------------------------------|--------------------------|--------------------------|--------------------------|-------|-------|-------|-------|
| 168    | CUMC-051  | 102-1                            | 70               | F   | RAEB-1           | High                       | 8          | 35                        | 10        | 96                             | 0.4                      | 1.3:1                    | 0.57                     | 13.22 | 13.79 | 59.68 | 29.93 |
| 169    | CUMC-123  | 103-1                            | 71               | M   | RCMD-RS          | N/A                        | 1          | 82                        | 9.6       | 307                            | 2.12                     | 1:2                      | 0.60                     | 2.27  | 20.69 | 36.07 | 40.38 |
| 170    | CUMC-097  | 104-1                            | 81               | M   | RCMD-RS          | Intermediate               | 1          | 83                        | 7.7       | 145                            | 2.75                     | 1:1                      | 4.36                     | 7.23  | 11.18 | 25.81 | 51.42 |
| 171    | CUMC-232  | 104-2                            | 82               | M   | RARS             | Intermediate               | 0          | 60                        | 7.5       | 243                            | 3.01                     | 1:1                      | 1.57                     | 3.40  | 10.28 | 35.89 | 48.85 |
| 172    | CUMC-300  | 104-3                            | 83               | M   | RARS             | Intermediate               | 1          | 80                        | 7.9       | 314                            | 4.38                     | 1:1                      | 2.69                     | 4.26  | 8.11  | 48.17 | 36.76 |
| 173    | CUMC-182  | 105-1                            | 83               | F   | RAEB-1           | Intermediate               | 7          | Present (Unable to asses) | 7.3       | 131                            | 0.99                     | 3:1                      | No TED detected (No TED) |       |       |       |       |
| 174    | CUMC-222  | 105-2                            | 84               | F   | RCMD-RS          | Low                        | 4          | 50                        | 10.55     | 88                             | 0.92                     | 1:2                      | 1.51                     | 4.31  | 10.17 | 35.07 | 48.93 |
| 175    | CUMC-244  | 105-3                            | 84               | F   | RCMD-RS          | Intermediate               | 4          | 60                        | 7         | 75                             | 0.85                     | 1.3:1                    | 3.29                     | 4.68  | 15.08 | 34.49 | 42.46 |
| 176    | CUMC-196  | 106-1                            | 69               | M   | RCMD-RS          | Low                        | 2          | 93                        | 6.3       | 222                            | 2.53                     | 1:1.9                    | 3.87                     | 6.58  | 19.12 | 28.61 | 41.82 |
| 177    | CUMC-212  | 106-2                            | 69               | M   | RCMD-RS          | Low                        | 2          | 93                        | 7.9       | 227                            | 1.8                      | No TED detected (No TED) |                          |       |       |       |       |
| 178    | CUMC-206  | 107-1                            | 66               | M   | RAEB-2           | Intermediate               | 12         | Not present               | 13.7      | 132                            | 1.15                     | 1:1                      | 2.74                     | 5.98  | 9.84  | 48.65 | 32.78 |
| 179    | CUMC-048  | 108-1                            | 74               | M   | RCMD             | Intermediate               | 5          | Not present               | 10.7      | 88                             | 4.74                     | 9:1                      | No TED detected (No TED) |       |       |       |       |
| 180    | CUMC-126  | 110-1                            | 62               | M   | RAEB-1           | High                       | 7          | Not present               | 9         | 18                             | 2.88                     | 2:1                      | 3.24                     | 3.31  | 24.62 | 37.84 | 31.00 |
| 181    | CUMC-194  | 111-1                            | 59               | F   | MDS/MPN (RARS-T) | N/A                        | 2          | 70                        | 8.6       | 797                            | 4.09                     | 1.9:1                    | 5.52                     | 6.58  | 10.43 | 24.19 | 53.29 |
| 182    | CUMC-239  | 111-2                            | 59               | F   | MDS/MPN (RARS-T) | Very low                   | 1          | 50                        | 10.9      | 497                            | 2.99                     | 3:1                      | No TED detected (No TED) |       |       |       |       |
| 183    | CUMC-279  | 112-1                            | 83               | F   | RCMD             | N/A                        | 1          | Not present               | 7.3       | 41                             | No Data                  | <1:1                     | No TED detected (No TED) |       |       |       |       |
| 184    | CUMC-304  | 113-1                            | 89               | M   | RARS             | Low                        | 1          | 45                        | 9.1       | 237                            | 2                        | 2:1                      | 1.34                     | 3.38  | 9.42  | 50.43 | 35.43 |
| 185    | CUMC-280  | 114-1                            | 79               | M   | RCMD-RS          | N/A                        | 1          | 70                        | 8.7       | 254                            | No Data                  | 10:1                     | 4.07                     | 8.41  | 16.99 | 33.60 | 36.92 |
| 186    | CUMC-114  | 115-1                            | 65               | F   | RCMD             | N/A                        | No Info    | Not present               | 8.9       | 191                            | 1.23                     | Not calculate            | No TED detected (No TED) |       |       |       |       |
| 187    | CUMC-152  | 115-2                            | 65               | F   | RCMD             | High                       | 3          | No record                 | 6.3       | 252                            | 2.51                     | 15:1                     | No TED detected (No TED) |       |       |       |       |
| 188    | CUMC-319  | 116-1                            | 68               | M   | RCMD             | Intermediate               | 1          | Not present               | 8.5       | 60                             | 1.23                     | 1.5:1                    | 0.95                     | 2.15  | 5.25  | 34.37 | 57.28 |
| 189    | CUMC-191  | 117-1                            | 86               | M   | RCMD             | Low                        | 1          | Not present               | 10.2      | 29                             | 1.51                     | 2.4:1                    | 0.73                     | 3.78  | 17.13 | 32.22 | 46.15 |
| 190    | CUMC-163  | 118-1                            | 68               | F   | RCMD             | Low                        | 1          | Unable to asses           | 9.9       | 108                            | 2.37                     | 36:1                     | No TED detected (No TED) |       |       |       |       |
| 191    | CUMC-076  | 122-1                            | 71               | F   | RCMD             | N/A                        | No Info    | Not present               | 9.7       | 52                             | 2.08                     | Not calculate            | 1.91                     | 2.61  | 11.20 | 36.98 | 47.29 |
| 192    | CUMC-168  | 122-2                            | 72               | F   | RCMD             | Intermediate               | 2          | Not present               | 9.5       | 60                             | 2.13                     | 7:1                      | 0.46                     | 1.29  | 6.22  | 41.00 | 51.03 |
| 193    | CUMC-246  | 122-3                            | 72               | F   | RCMD             | Intermediate               | 1          | Not present               | 8.8       | 27                             | 2.24                     | 1.5:1                    | 0.63                     | 0.66  | 7.73  | 26.34 | 64.64 |
| 194    | CUMC-259  | 122-4                            | 72               | F   | RCMD             | Intermediate               | 2          | Inadequate                | 9.3       | 28                             | 1.4                      | 2:1                      | 1.22                     | 2.87  | 12.15 | 28.95 | 54.81 |
| 195    | CUMC-164  | 123-1                            | 67               | F   | RAEB-2           | Very high                  | 17         | No record                 | 11        | 82                             | 0.61                     | 2:1                      | 2.91                     | 3.33  | 10.15 | 35.94 | 47.67 |

| Sl.No. | Sample ID | Unique Patient ID - repeat order | Age <sup>1</sup> | Sex | WHO     | Risk Category <sup>2</sup> | Myeloblast | Ring Sideroblast (%) | Hg (g/dL) | Platelets (10 <sup>9</sup> /L) | ANC (10 <sup>9</sup> /L) | M:E Ratio   | Pro <sup>3</sup>         | EB    | LB    | Poly  | Ortho |
|--------|-----------|----------------------------------|------------------|-----|---------|----------------------------|------------|----------------------|-----------|--------------------------------|--------------------------|-------------|--------------------------|-------|-------|-------|-------|
| 196    | CUMC-200  | 123-2                            | 68               | F   | RAEB-2  | Very high                  | 15         | Not present          | 9.9       | 76                             | 0.69                     | 2:1         | 1.58                     | 3.01  | 15.78 | 41.88 | 37.75 |
| 197    | CUMC-242  | 123-3                            | 68               | F   | RAEB-2  | Very high                  | 15         | Not present          | 8.2       | 95                             | 1.16                     | able to ass | No TED detected (No TED) |       |       |       |       |
| 198    | CUMC-131  | 124-1                            | 78               | M   | RAEB-2  | High                       | 11         | Not present          | 10.8      | 42                             | 1.94                     | >5:1        | 0.44                     | 3.83  | 14.02 | 43.04 | 38.67 |
| 199    | CUMC-062  | 125-1                            | 72               | M   | RA      | Very low                   | 1          | Not present          | 12.1      | 51                             | 2.94                     | 1.5-2:1     | 4.92                     | 5.15  | 17.30 | 42.36 | 30.28 |
| 200    | CUMC-303  | 126-1                            | 79               | M   | RA      | Low                        | 1          | Not present          | 8.8       | 254                            | 3.94                     | 2.5:1       | 1.50                     | 4.28  | 9.95  | 40.28 | 43.98 |
| 201    | CUMC-208  | 128-1                            | 81               | F   | RAEB-2  | Very high                  | 15         | Not present          | 7.8       | 484                            | 1                        | 4:1         | 2.79                     | 6.22  | 14.11 | 37.95 | 38.93 |
| 202    | CUMC-265  | 129-1                            | 79               | F   | RCMD-RS | Very low                   | 2          | 25                   | 13.9      | 163                            | 0.8                      | 2:1         | 0.98                     | 2.27  | 12.92 | 33.23 | 50.59 |
| 203    | CUMC-189  | 130-1                            | 55               | F   | RCMD    | Low                        | 2          | Not present          | 8         | 430                            | 0.83                     | 2:1         | 3.55                     | 10.88 | 32.54 | 29.79 | 23.24 |
| 204    | CUMC-286  | 131-1                            | 67               | F   | RARS    | N/A                        | 1          | 25                   | 11.6      | 197                            | No Data                  | 3:1         | No TED detected (No TED) |       |       |       |       |
| 205    | CUMC-272  | 133-1                            | 70               | F   | RCMD    | Very low                   | 2          | Not present          | 11.9      | 236                            | 2.13                     | 3:1         | 1.40                     | 5.89  | 23.23 | 35.05 | 34.42 |

1, Age at sample collection in years

2, IPSS-R is calculated for each sample, N/A=not enough information to calculate IPSS-R or it was RARS-T sample.

3, Adequate cells with GPA expression present but not enough cells to accurately quantify cells in various stages of TED



Table S2: Percentage of cells at each distinct stage of maturation in normal individuals. Data after normalization based on total nucleated erythroid cells as 100%.

| Normal Samples | Pro | EB   | LB   | Poly | Ortho |
|----------------|-----|------|------|------|-------|
| 1              | 4.3 | 8.5  | 15.1 | 25.5 | 46.8  |
| 2              | 2.8 | 5.5  | 13.1 | 27.4 | 51.2  |
| 3              | 4.6 | 10.1 | 22.8 | 29.4 | 33.1  |
| 4              | 2.3 | 6.2  | 13.2 | 28.9 | 49.4  |
| 5              | 3.9 | 8    | 14.2 | 30.4 | 43.8  |
| 6              | 5   | 7.1  | 14.3 | 26.8 | 46.8  |
| 7              | 2.3 | 5.3  | 13   | 27.2 | 51.3  |
| 8              | 4.1 | 7.6  | 11.7 | 26.8 | 49.8  |
| 9              | 5.3 | 7.7  | 14   | 24.5 | 48.5  |
| 10             | 3.7 | 7    | 16.6 | 35.7 | 37    |
| 11             | 2.1 | 3.1  | 10.9 | 29   | 54.9  |
| 12             | 3.9 | 6.4  | 12.1 | 25.3 | 52.4  |
| 13             | 3.5 | 8.4  | 12.4 | 24.3 | 51.5  |
| 14             | 3   | 4.8  | 10.9 | 31   | 50.3  |
| 15             | 2.4 | 4.1  | 12   | 28.2 | 53.3  |
| 16             | 4.6 | 7.7  | 14.5 | 25.5 | 47.6  |

Table S3: List of genes and the exon numbers analyzed by targeted sequencing

| Sl.No. | Gene Name     | Target Exons    | Sl.No. | Gene Name     | Target Exons           |
|--------|---------------|-----------------|--------|---------------|------------------------|
| 1      | <i>ABL1</i>   | 4 to 6          | 28     | <i>STAG2</i>  | Full                   |
| 2      | <i>ASXL1</i>  | 12              | 29     | <i>TET2</i>   | 3 to 11                |
| 3      | <i>BCOR</i>   | Full            | 30     | <i>TP53</i>   | 2 to 11                |
| 4      | <i>CALR</i>   | 9               | 31     | <i>U2AF1</i>  | 2, 6                   |
| 5      | <i>CBL</i>    | 8 to 9          | 32     | <i>ZRSR2</i>  | Full                   |
| 6      | <i>CEBPA</i>  | Full            | 33     | <i>CSF3R</i>  | 14 to 17               |
| 7      | <i>CUX1</i>   | Full            | 34     | <i>ATRX</i>   | 8 to 10, 17 to 31      |
| 8      | <i>DNMT3A</i> | Full            | 35     | <i>BCORL1</i> | Full                   |
| 9      | <i>ETV6</i>   | Full            | 36     | <i>BRAF</i>   | 15                     |
| 10     | <i>EZH2</i>   | Full            | 37     | <i>CBLB</i>   | 9 to 10                |
| 11     | <i>GATA2</i>  | 2 to 6          | 38     | <i>CBLC</i>   | 9 to 10                |
| 12     | <i>IDH1</i>   | 4               | 39     | <i>CDKN2A</i> | Full                   |
| 13     | <i>IDH2</i>   | 4               | 40     | <i>FBXW7</i>  | 9 to 11                |
| 14     | <i>JAK2</i>   | 12, 14          | 41     | <i>FLT3</i>   | 14, 15, 20             |
| 15     | <i>KIT</i>    | 2, 8-11, 13, 17 | 42     | <i>GATA1</i>  | 2                      |
| 16     | <i>KMT2A</i>  | 5 to 8          | 43     | <i>GNAS</i>   | 8 to 9                 |
| 17     | <i>KRAS</i>   | 2 to 3          | 44     | <i>HRAS</i>   | 2 to 3                 |
| 18     | <i>MPL</i>    | 10              | 45     | <i>IKZF1</i>  | Full                   |
| 19     | <i>NPM1</i>   | 12              | 46     | <i>JAK3</i>   | 13                     |
| 20     | <i>NRAS</i>   | 2 to 3          | 47     | <i>KDM6A</i>  | Full                   |
| 21     | <i>PDGFRA</i> | 12, 14, 18      | 48     | <i>MYD88</i>  | 3 to 5                 |
| 22     | <i>PTPN11</i> | 3, 13           | 49     | <i>NOTCH1</i> | 26-28, 34              |
| 23     | <i>RUNX1</i>  | Full            | 50     | <i>PHF6</i>   | Full                   |
| 24     | <i>SETBP1</i> | 4 partial       | 51     | <i>PTEN</i>   | 5, 7                   |
| 25     | <i>SF3B1</i>  | 13-16           | 52     | <i>RAD21</i>  | Full                   |
| 26     | <i>SMC1A</i>  | 2, 11, 16, 17   | 53     | <i>SMC3</i>   | 10, 13, 19, 23, 25, 28 |
| 27     | <i>SRSF2</i>  | 1               | 54     | <i>WT1</i>    | 7, 9                   |

Table S4: Descriptive statistics for each TED stage in all samples from MDS and MDS-MPN (RARS-T) including samples obtained from same patients at different time-point and Normal samples

|       | Patients (n=149) |        | Normal (n=16) |        |
|-------|------------------|--------|---------------|--------|
|       | Mean             | Median | Mean          | Median |
| Pro   | 2.3              | 1.9    | 3.6           | 3.8    |
| EB    | 4.8              | 4.0    | 6.7           | 7.1    |
| LB    | 13.2             | 12.4   | 13.8          | 13.2   |
| Poly  | 36.1             | 35.1   | 27.9          | 27.3   |
| Ortho | 43.7             | 45.4   | 48.0          | 49.6   |

Table S5: Number of samples of each IPSS-R subtype between TED-positive and TED-negative samples

|              | TED      | No TED   |
|--------------|----------|----------|
| Very Low     | 27 (87%) | 4 (13%)  |
| Low          | 47 (80%) | 12 (20%) |
| Intermediate | 33 (66%) | 17 (33%) |
| High         | 13 (76%) | 4 (24%)  |
| Very High    | 12 (63%) | 7 (37%)  |

Table S6: Number of patients in each group on different therapies.

| Drug/Therapy                  | TED (n=89) | NoTED (n=24) |
|-------------------------------|------------|--------------|
| Erythrocyte stimulating agent | 10         | 0            |
| Revlimid                      | 2          | 3            |
| Rigosertib                    | 7          | 1            |
| Hypomethylating agent         | 5          | 2            |
| No therapy                    | 54         | 16           |
| Other/no information          | 11         | 2            |

Table S7: Mutation identified in 119 out 126 patients screened for mutations

| Sl.No. | Unique ID | Gene (Mutation)                                                                                                                                                                                                          |
|--------|-----------|--------------------------------------------------------------------------------------------------------------------------------------------------------------------------------------------------------------------------|
| 1      | 2         | ASXL1 (p.Y700X); SRSF2 (p.Y92N); U2AF1 (p.Q157P);                                                                                                                                                                        |
| 2      | 3         | U2AF1 (c.C101T;p.S34F);                                                                                                                                                                                                  |
| 3      | 4         | KIT (c.145C>T;p.R49C); SF3B1 (c.1986C>A;p.H662Q);                                                                                                                                                                        |
| 4      | 5         | CSF3R (c.2326C>T;p.Q776*); CUX1<br>(c.2536_2537delAC;p.T846Gfs*40 c.2542G>A;p.G848S c.2548_2556delAAAGAGAAG;p.K850_K852del c.2556G>T;p.K852N); U2AF1 (c.470A>C;p.Q157P); ZRSR2<br>(c.1338_1343dupGAGCCG;p.S447_R448dup); |
| 5      | 6         | TET2 (p.G1861R);                                                                                                                                                                                                         |
| 6      | 7         | DNMT3A (c.547C>T;p.R183W); ZRSR2 (c.1338_1343dupGAGCCG;p.S447_R448dup);                                                                                                                                                  |
| 7      | 9         | None                                                                                                                                                                                                                     |
| 8      | 10        | None                                                                                                                                                                                                                     |
| 9      | 11        | None                                                                                                                                                                                                                     |
| 10     | 12        | BCOR (c.4618_4619insCA;p.L1540Pfs*7); BCOR (c.4618_4619insCA;p.L1540Pfs*7); IDH1<br>(c.257T>C;p.F86S); RUNX1 (c.317G>A;p.W106*); U2AF1 (c.101C>T;p.S34F);                                                                |
| 11     | 13        | RAD21 (c.121C>A;p.V41L);                                                                                                                                                                                                 |
| 12     | 14        | BCOR (c.1005dupC;p.S336Lfs*45); BCOR (c.1005dupC;p.S336Lfs*45); IDH2<br>(c.419G>A;p.R140Q); RUNX1<br>(c.958C>T;p.R320* c.610C>T;p.R204* c.327_328dupCA;p.K110Tfs*13); SRSF2<br>(c.284C>A;p.P95H);                        |
| 13     | 15        | SF3B1 (c.1874G>T;p.R625L); TET2 (c.3646C>T;p.R1216*);                                                                                                                                                                    |
| 14     | 16        | ASXL1 (c.3498C>G;p.S1166R); CDKN2A (c.379G>T;p.A127S);                                                                                                                                                                   |
| 15     | 17        | IDH1 (c.395G>A;p.R132H); SF3B1 (c.2225G>A;p.G742D); TET2<br>(c.2599T>C;p.Y867H c.5167C>T;p.P1723S);                                                                                                                      |
| 16     | 18        | ASXL1 (c.3306G>T;p.E1102D); PHF6 (c.90dupG;p.L31Vfs*5); RUNX1 (c.281G>T;p.S94I);<br>TET2 (c.651delC;p.V218Wfs*32); ZRSR2 (c.827C>A;p.S276*);                                                                             |
| 17     | 19        | DNMT3A (c.939G>A;p.W313*); TET2 (c.3384T>A;p.Y1128* c.3823G>T;p.G1275W); U2AF1<br>(c.101C>T;p.S34F);                                                                                                                     |
| 18     | 20        | None                                                                                                                                                                                                                     |
| 19     | 21        | SF3B1 (c.2098A>G;p.K700E); STAG2 (c.1027G>A;p.V343I); TET2<br>(c.651delC;p.V218Wfs*32 c.3953A>C;p.E1318A c.4635G>C;p.Q1545H);                                                                                            |
| 20     | 22        | ASXL1 (Frameshift);                                                                                                                                                                                                      |
| 21     | 24        | ASXL1 (c.C1210T;p.R404X); SRSF2 (c.C284T;p.P95L);                                                                                                                                                                        |
| 22     | 25        | None                                                                                                                                                                                                                     |
| 23     | 26        | None                                                                                                                                                                                                                     |
| 24     | 27        | ASXL1 (c.2694G>A;p.W898*); NRAS (c.179G>A;p.G60E); RUNX1 (c.958C>T;p.R320*); SRSF2<br>(c.284C>A;p.P95H); TET2<br>(p.H1792Qfs*29c.4011T>A;p.Y1337* c.5319delC;p.F1773Lfs*47 c.5375_5376insAA);                            |
| 25     | 28        | SF3B1 (c.1866G>C;p.E622D); SRSF2 (c.284C>G;p.P95R);                                                                                                                                                                      |
| 26     | 31        | BCOR (c.3763G>A;p.G1255S); BCOR (c.3763G>A;p.G1255S); GATA2 (c.481C>G;p.P161A);                                                                                                                                          |
| 27     | 32        | None                                                                                                                                                                                                                     |

| Sl.No. | Unique ID | Gene (Mutation)                                                                                                                                                                                                       |
|--------|-----------|-----------------------------------------------------------------------------------------------------------------------------------------------------------------------------------------------------------------------|
| 28     | 34        | TET2 (c.845_846delCT;p.S282* c.5482C>T;p.Q1828*); U2AF1 (c.101C>T;p.S34F);                                                                                                                                            |
| 29     | 35        | SF3B1 (p.K666T);                                                                                                                                                                                                      |
| 30     | 36        | ASXL1 (p.T844I;c.2531C>Tp.L1395V;c.4183C>G); DNMT3A (c.1852-1G>A); U2AF1 (c.A470C:p.Q157P);                                                                                                                           |
| 31     | 37        | TP53 (c.T310G:p.Y104D);                                                                                                                                                                                               |
| 32     | 38        | DNMT3A (p.Y546C); SF3B1 (p.K700E);                                                                                                                                                                                    |
| 33     | 39        | TP53 (c.G422A:p.R141H;c.G347A:p.R116Q);                                                                                                                                                                               |
| 34     | 40        | DNMT3A (c.2645G>A;p.R882H); TP53 (c.743G>A;p.R248Q);                                                                                                                                                                  |
| 35     | 41        | ETV6 (c.602T>C;p.L201P c.1193T>A;p.L398Q); SRSF2 (c.284_307delCCCCGACTCACACCACAGCCGCC;p.P95_R102del); STAG2 (c.3223_3227delTCAAA;p.S1075Tfs*11);                                                                      |
| 36     | 42        | Not sequenced                                                                                                                                                                                                         |
| 37     | 43        | RUNX1 (c.G530A:p.R177Q); SRSF2 (c.C284G:p.P95R); TET2 (c.4045-1G>T);                                                                                                                                                  |
| 38     | 45        | None                                                                                                                                                                                                                  |
| 39     | 46        | CBL (c.1211G>A;p.C404Y); IDH1 (c.395G>A;p.R132H); KIT (c.1588G>A;p.V530I); SRSF2 (c.284C>G;p.P95R);                                                                                                                   |
| 40     | 47        | DNMT3A (c.2281A>G;p.M761V c.1802G>A;p.W601*); EZH2 (c.2084C>A;p.S695*); GATA2 (c.1160_1165delCCATGA;p.T387_M388del); KDM6A (c.2331T>A;p.N777K); TET2 (c.3378_3379delTC;p.Q1127Ifs*2); ZRSR2 (c.853delT;p.S285Lfs*20); |
| 41     | 48        | SF3B1 (p.D781G); TP53 (p.G266R);                                                                                                                                                                                      |
| 42     | 49        | JAK2 (c.G1849T:p.V617F); TP53 (c.G347A:p.R116Q); U2AF1 (c.A470G:p.Q157R);                                                                                                                                             |
| 43     | 50        | TET2 (c.3637dupG;p.V1213Gfs*10 c.4393C>T;p.R1465*);                                                                                                                                                                   |
| 44     | 51        | DNMT3A (c.1903C>G;p.R635G); SF3B1 (c.2098A>G;p.K700E);                                                                                                                                                                |
| 45     | 52        | ETV6 (c.77G>C;p.S26T);                                                                                                                                                                                                |
| 46     | 54        | SF3B1 (p.H662D);                                                                                                                                                                                                      |
| 47     | 55        | SF3B1 (p.H662Q);                                                                                                                                                                                                      |
| 48     | 56        | None                                                                                                                                                                                                                  |
| 49     | 57        | CSF3R (c.2087T>C;p.M696T); RUNX1 (c.472T>C;p.F158L); SRSF2 (c.284C>A;p.P95H); STAG2 (c.1644dupT;p.T549Yfs*11); TET2 (c.3748delG;p.E1250Rfs*3);                                                                        |
| 50     | 58        | RUNX1 (c.292delC;p.L98Sfs*24); SF3B1 (c.2098A>G;p.K700E);                                                                                                                                                             |
| 51     | 59        | DNMT3A (c.2311C>T;p.R771*); SF3B1 (c.2098A>G;p.K700E); TET2 (c.4100C>A;p.P1367Q);                                                                                                                                     |
| 52     | 60        | U2AF1 (c.101C>T;p.S34F);                                                                                                                                                                                              |
| 53     | 61        | DNMT3A (c.930T>G;p.I310M); SF3B1 (c.2098A>G;p.K700E);                                                                                                                                                                 |
| 54     | 62        | ASXL1 (c.1934delG;p.G645Vfs*58 c.2385delC;p.W796Gfs*22 c.4189G>A;p.G1397S); SRSF2 (c.284C>A;p.P95H); TET2 (c.1648C>T;p.R550* c.3268_3269delAA;p.K1090Dfs*13 c.3409+1G>A c.3782G>A;p.R1261H c.5618T>C;p.I1873T);       |
| 55     | 63        | GNAS (c.602G>A;p.R201H); SF3B1 (c.2098A>G;p.K700E); TET2 (c.2599T>C;p.Y867H c.3142delC;p.L1048Sfs*7 c.5167C>T;p.P1723S);                                                                                              |
| 56     | 65        | DNMT3A (c.1712_1719delCTGCCAG;p.A571Gfs*4); SF3B1 (c.2098A>G;p.K700E); TET2 (c.1664dupC;p.T556Nfs*11 c.4597A>T;p.K1533*);                                                                                             |

| Sl.No. | Unique ID | Gene (Mutation)                                                                                                                                           |
|--------|-----------|-----------------------------------------------------------------------------------------------------------------------------------------------------------|
| 57     | 66        | ASXL1 (c.1934_1935insG;p.G646WfsX12); ETV6 (c.1015A>G;p.R339G); EZH2 (c.1769_1772delGTCT;p.C590Lfs*84);                                                   |
| 58     | 67        | CUX1 (p.R158*); ETV6 (p.R160+); SF3B1 (p.K700E); TET2 (p.Q1191*);                                                                                         |
| 59     | 69        | SF3B1 (c.2347G>A;p.E783K);                                                                                                                                |
| 60     | 70        | KIT (c.200C>G;p.T67S); SRSF2 (c.284C>G;p.P95R); TET2 (c.1955dupA;p.F653Vfs*28 c.2871dupA;p.Q958Tfs*14);                                                   |
| 61     | 71        | None                                                                                                                                                      |
| 62     | 72        | ASXL1 (c.1919_1929del11; p.A640fs); CEBPA (c.1021A>G;p.I341V); RUNX1 (c.484A>G;p.R162G); SRSF2 (c.284C>A;p.P95H); STAG2 (c.852dupG;p.M285Dfs*6);          |
| 63     | 73        | ETV6 (c.629G>A;p.R210H); PHF6 (p.C242S); SF3B1 (p.E622D); TET2 (p.Y1693*); ZRSR2 (p.Q127-);                                                               |
| 64     | 74        | None                                                                                                                                                      |
| 65     | 75        | SF3B1 (p.K700E);                                                                                                                                          |
| 66     | 76        | EZH2 (c.392T>A;p.I131N); RUNX1 (c.601C>T;p.R201*); SF3B1 (c.2098A>G;p.K700E); SRSF2 (c.284C>A;p.P95H);                                                    |
| 67     | 77        | ASXL1 (c.2083C>T;p.Q695*); IDH2 (c.419G>A;p.R140Q); SRSF2 (c.284C>G;p.P95R); STAG2 (c.646C>T;p.R216*); ZRSR2 (c.1338_1343dupGAGCCG;p.S447_R448dup);       |
| 68     | 78        | ATRX (c.5579A>G;p.N1860S); TET2 (c.4100C>G;p.P1367R c.4609C>T;p.Q1537*);                                                                                  |
| 69     | 79        | TET2 (c.2599T>C;p.Y867H c.5167C>T;p.S34F); U2AF1 (c.101C>T;p.S34F);                                                                                       |
| 70     | 80        | CALR (c.1092_1143del52; p.L367Tfs*46; c.1137G>C; p.E379D); SF3B1 (c.2098A>G; p.K700E); TP53 (c.743G>A; p.R248Q);                                          |
| 71     | 81        | BCOR (c.4717+2T>C); BCOR (c.4717+2T>C); DNMT3A (c.2645G>A;p.R882H c.185G>A;p.S62N); TET2 (c.2599T>C;p.Y867H c.5167C>T;p.P1723S); U2AF1 (c.101C>A;p.S34Y); |
| 72     | 82        | SF3B1 (p.K700E);                                                                                                                                          |
| 73     | 83        | ASXL1 (c.4189G>A;p.G1397S); DNMT3A (c.2645G>A;p.R882H); TET2 (c.1894C>T;p.Q632* c.3322_3323delCC;p.P1108Ffs*21);                                          |
| 74     | 84        | ASXL1 (p.G646WfsX12;c.1934_1935insG); SF3B1 (p.K700E); TET2 (p.K201-);                                                                                    |
| 75     | 86        | KDM6A (c.2331T>A;p.N777K); ZRSR2 (c.541T>A;p.C181S);                                                                                                      |
| 76     | 88        | TET2 (c.1176_1177delTT;p.S393Cfs*49 c.5100delT;p.N1700Kfs*19);                                                                                            |
| 77     | 89        | TP53 (p.V157F);                                                                                                                                           |
| 78     | 90        | None                                                                                                                                                      |
| 79     | 91        |                                                                                                                                                           |
| 80     | 92        | IDH2 (c.419G>A;p.R140Q); NRAS (c.190T>G;p.Y64D); SRSF2 (c.284C>A;p.P95H);                                                                                 |
| 81     | 93        | JAK2 (c.1849G>T;p.V617F); SF3B1 (c.1986C>G;p.H662Q); TET2 (c.4282delG;p.E1428Sfs*20 c.5618T>C;p.I1873T);                                                  |
| 82     | 95        | RUNX1 (p.Q247-); SF3B1 (p.K700E); TET2 (p.R1455-;ML (1456-1457); -);                                                                                      |
| 83     | 97        | ASXL1 (c.2060_2061delGT;Frameshiftc.2957A>G;p.N986S); SF3B1 (p.E622D);                                                                                    |
| 84     | 98        | KDM6A (c.1960C>A;p.P654T);                                                                                                                                |
| 85     | 99        | SRSF2 (c.284C>A;p.P95H); TET2 (c.5473C>T;p.Q1825*);                                                                                                       |
| 86     | 100       | DNMT3A (p.F1259L);                                                                                                                                        |
| 87     | 101       | None                                                                                                                                                      |
| 88     | 102       | DNMT3A (c.2339T>C;p.I780T c.1474+1G>C); SF3B1 (c.2098A>G;p.K700E); SRSF2 (c.284C>T;p.P95L); TET2 (c.3986T>A;p.L1329Q c.4011T>A;p.Y1337*);                 |



| Sl.No. | Unique ID | Gene (Mutation)                                                                                                                                                                                                                          |
|--------|-----------|------------------------------------------------------------------------------------------------------------------------------------------------------------------------------------------------------------------------------------------|
| 89     | 103       | ASXL1 (c.1900_1922delAGAGAGGGCGCCACCACTGCCAT;p.E635Rfs*15); EZH2 (c.786dupC;p.N263Qfs*8); SF3B1 (c.2098A>G;p.K700E);                                                                                                                     |
| 90     | 104       | SF3B1 (p.R625C);                                                                                                                                                                                                                         |
| 91     | 105       | None                                                                                                                                                                                                                                     |
| 92     | 106       | SF3B1 (c.2098T>C p.K700E);                                                                                                                                                                                                               |
| 93     | 107       | GATA2 (c.481C>G;p.P161A);                                                                                                                                                                                                                |
| 94     | 108       | ASXL1 (c.2077C>T;p.R693*); EZH2 (c.2061C>A;p.N687K); NRAS (c.182A>C;p.Q61P c.35G>A;p.G12D); PTPN11 (c.1472C>T;p.P491L); SF3B1 (c.1997A>C;p.K666T); TET2 (c.1337delT;p.L446*);                                                            |
| 95     | 110       | ASXL1 (c.2131dupA;p.T711Nfs*7 c.2133dupT;p.A712Cfs*6); BCOR (c.4021C>T;p.R1341W c.3987C>A;p.C1329*); BCOR (c.4021C>T;p.R1341W c.3987C>A;p.C1329*); CBL (c.1259G>A;p.R420Q); CEBPA (c.878_880delACA;p.N293del); ETV6 (c.1138T>G;p.W380G); |
| 96     | 111       | ASXL1 (c.3426G>C;p.Q1142H); SF3B1 (p.K700E);                                                                                                                                                                                             |
| 97     | 112       | SETBP1 (c.2612T>C;p.I871T); TET2 (c.2599T>C;p.Y867H c.5167C>T;p.P1723S);                                                                                                                                                                 |
| 98     | 113       | ASXL1 (c.3745A>G;p.M1249V); CUX1 (c.124A>T;p.K42*); SF3B1 (c.2098A>G;p.K700E);                                                                                                                                                           |
| 99     | 114       | DNMT3A (c.1126G>A;p.A376T c.918G>A;p.W306*); SF3B1 (c.1873C>T;p.R625C);                                                                                                                                                                  |
| 100    | 115       | DNMT3A (c.1969G>A;p.V657M); SF3B1 (c.2098A>G;p.K700E);                                                                                                                                                                                   |
| 101    | 116       | DNMT3A (c.746dupA;p.P250Afs*3 c.723_745delGGCCAGCCCTCCTGCTGTGCAGC;p.S243Hfs*2 c.745C>G;p.Q249E c.742C>G;p.Q248E); NOTCH1 (c.7648A>G;p.I2550V); TET2 (c.22C>G;p.H8D);                                                                     |
| 102    | 117       | None                                                                                                                                                                                                                                     |
| 103    | 118       | CUX1 (c.1573C>G;p.L525V);                                                                                                                                                                                                                |
| 104    | 122       | None                                                                                                                                                                                                                                     |
| 105    | 123       | CDKN2A (c.430C>T;p.R144C); CSF3R (c.2488C>T;p.P830S);                                                                                                                                                                                    |
| 106    | 124       | CUX1 (c.4123C>T;p.P1375S); SRSF2 (c.284C>T;p.P95L); TET2 (c.3380A>C;p.Q1127P c.3383delA;p.Y1128Lfs*9 c.3385delG;p.D1129lfs*8 c.3635T>A;p.L1212*);                                                                                        |
| 107    | 125       | ASXL1 (c.3910C>G;p.L1304V);                                                                                                                                                                                                              |
| 108    | 126       | DNMT3A (c.1429+1G>A);                                                                                                                                                                                                                    |
| 109    | 128       | BCOR (c.1005dupC;p.S336Lfs*45); BCOR (c.1005dupC;p.S336Lfs*45); BCORL1 (c.3158A>G;p.K1053R); CSF3R (c.2326C>T;p.Q776*); EZH2 (c.2228G>A;p.G743D); GATA2 (c.383_384dupCC;p.S129Pfs*90);                                                   |
| 110    | 129       | RUNX1 (c.939_950del12;p.L313fs); U2AF1 (c.470A>C; Q157P);                                                                                                                                                                                |
| 111    | 130       | CALR (c.1132G>C;p.E378Q c.1137G>C;p.E379D c.1144delG;p.A382Qfs*48); GATA2 (c.669G>A;p.M223I); SF3B1 (c.1873C>T;p.R625C); TET2 (c.419A>G;p.N140S);                                                                                        |
| 112    | 131       | CEBPA (c.584_589dupACCCGC;p.H195_P196dup); CUX1 (c.1538G>A;p.R513H); DNMT3A (c.1740delC;p.W581Gfs*70);                                                                                                                                   |
| 113    | 133       | DNMT3A (c.2206C>T;p.R736C); TP53 (c.746G>C;p.R249T);                                                                                                                                                                                     |

Table S8: Patients TED status, time since diagnosis, transfusion requirements, and whether the data is censored, alive/0, dead/1 at the time of study.

| Sl.No. | Unique Patient ID - repeat order | TED status | Time since diagnosis | Censored | Transfusion requirements |
|--------|----------------------------------|------------|----------------------|----------|--------------------------|
| 1      | 2-1                              | TED        | 86.1                 | 0        | Independent              |
| 2      | 3-1                              | TED        | 78.83                | 0        | Dependent                |
| 3      | 4-1                              | TED        | 36.9                 | 0        | Dependent                |
| 4      | 5-1                              | TED        | 19.77                | 1        | Dependent                |
| 5      | 6-1                              | NoTED      | 42.23                | 1        | Dependent                |
| 6      | 7-1                              | TED        | 20.53                | 0        | Dependent                |
| 7      | 9-1                              | TED        | 39.3                 | 0        | Independent              |
| 8      | 10-1                             | TED        | 88.47                | 0        | Independent              |
| 9      | 11-1                             | TED        | 103.57               | 0        | Dependent                |
| 10     | 12-1                             | TED        | 44.77                | 1        | Dependent                |
| 11     | 13-1                             | NoTED      | 67.73                | 0        | Dependent                |
| 12     | 14-1                             | TED        | 9.63                 | 0        | Independent              |
| 13     | 15-1                             | TED        | 81.13                | 1        | Dependent                |
| 14     | 16-1                             | NoTED      | 71.83                | 1        | Dependent                |
| 15     | 17-1                             | TED        | 94.9                 | 1        | Independent              |
| 16     | 18-1                             | TED        | 106.7                | 1        | Independent              |
| 17     | 19-1                             | TED        | 247.2                | 0        | Independent              |
| 18     | 20-1                             | TED        | 48.23                | 1        | Dependent                |
| 19     | 21-1                             | TED        | 76.1                 | 1        | Independent              |
| 20     | 22-1                             | TED        | 129.83               | 0        | Independent              |
| 21     | 24-1                             | TED        | 66.53                | 0        | Independent              |
| 22     | 25-1                             | TED        | 70                   | 1        | Independent              |
| 23     | 26-1                             | TED        | 71.33                | 0        | Dependent                |
| 24     | 27-1                             | TED        | 27.27                | 1        | Dependent                |
| 25     | 28-1                             | TED        | 92                   | 1        | Dependent                |
| 26     | 31-1                             | NoTED      | 43.6                 | 1        | Dependent                |
| 27     | 32-1                             | TED        | 33.17                | 1        | Independent              |
| 28     | 34-1                             | TED        | 192.47               | 1        | Independent              |
| 29     | 35-1                             | TED        | 76.97                | 0        | Dependent                |
| 30     | 36-1                             | TED        | 97.3                 | 1        | Dependent                |
| 31     | 37-1                             | NoTED      | 9.1                  | 1        | Dependent                |
| 32     | 38-1                             | TED        | 48.87                | 1        | Dependent                |
| 33     | 39-1                             | TED        | 85.6                 | 1        | Dependent                |
| 34     | 40-1                             | NoTED      | 28.7                 | 1        | Dependent                |
| 35     | 41-1                             | NoTED      | 23.2                 | 1        | Dependent                |
| 36     | 42-1                             | TED        | 51.17                | 0        | Independent              |
| 37     | 43-1                             | NoTED      | 69.93                | 1        | Dependent                |
| 38     | 45-1                             | TED        | 28.77                | 0        | Independent              |
| 39     | 46-1                             | NoTED      | 69.43                | 1        | Independent              |
| 40     | 47-1                             | TED        | 51.87                | 1        | Dependent                |
| 41     | 48-1                             | TED        | 218.1                | 0        | Dependent                |
| 42     | 49-1                             | NoTED      | 43.63                | 1        | Independent              |

| Sl.No. | Unique Patient ID - repeat order | TED status | Time since diagnosis | Censored | Transfusion requirements |
|--------|----------------------------------|------------|----------------------|----------|--------------------------|
| 43     | 50-1                             | TED        | 21.6                 | 1        | Independent              |
| 44     | 51-1                             | TED        | 159                  | 1        | Dependent                |
| 45     | 52-1                             | TED        | 56.4                 | 0        | Independent              |
| 46     | 54-1                             | TED        | 92.87                | 0        | Dependent                |
| 47     | 55-1                             | TED        | 138.43               | 0        | Dependent                |
| 48     | 56-1                             | TED        | 59                   | 0        | Independent              |
| 49     | 57-1                             | NoTED      | 29                   | 1        | Dependent                |
| 50     | 58-1                             | TED        | 70.37                | 1        | Independent              |
| 51     | 59-1                             | TED        | 89.5                 | 1        | Independent              |
| 52     | 60-1                             | NoTED      | 29.87                | 1        | Dependent                |
| 53     | 61-1                             | TED        | 72.93                | 0        | Dependent                |
| 54     | 62-1                             | NoTED      | 63.13                | 1        | Dependent                |
| 55     | 63-1                             | TED        | 51.13                | 0        | Dependent                |
| 56     | 65-1                             | TED        | 42.7                 | 0        | Independent              |
| 57     | 66-1                             | NoTED      | 86.77                | 1        | Dependent                |
| 58     | 67-1                             | TED        | 59.63                | 1        | Dependent                |
| 59     | 69-1                             | TED        | 122.53               | 0        | Dependent                |
| 60     | 70-1                             | TED        | 52.93                | 0        | Independent              |
| 61     | 71-1                             | TED        | 107.3                | 0        | Dependent                |
| 62     | 72-1                             | TED        | 48.63                | 1        | Independent              |
| 63     | 73-1                             | TED        | 137.57               | 1        | Dependent                |
| 64     | 74-1                             | TED        | 122.6                | 0        | Independent              |
| 65     | 75-1                             | TED        | 264.9                | 0        | Dependent                |
| 66     | 76-1                             | NoTED      | 54.47                | 1        | Dependent                |
| 67     | 77-1                             | TED        | 25.37                | 1        | Independent              |
| 68     | 78-1                             | TED        | 67                   | 0        | Independent              |
| 69     | 79-1                             | TED        | 32.1                 | 1        | Independent              |
| 70     | 80-1                             | NoTED      | 130.5                | 0        | Dependent                |
| 71     | 81-1                             | TED        | 49.83                | 0        | Dependent                |
| 72     | 82-1                             | TED        | 83.93                | 0        | Dependent                |
| 73     | 83-1                             | TED        | 18.9                 | 1        | Dependent                |
| 74     | 84-1                             | TED        | 158.87               | 0        | Independent              |
| 75     | 86-1                             | TED        | 53.2                 | 0        | Independent              |
| 76     | 88-1                             | TED        | 105.73               | 0        | Independent              |
| 77     | 89-1                             | TED        | 27.9                 | 1        | Dependent                |
| 78     | 90-1                             | TED        | 103.07               | 1        | Independent              |
| 79     | 91-1                             | TED        | 114.53               | 0        | Independent              |
| 80     | 92-1                             | NoTED      | 25.03                | 1        | Dependent                |
| 81     | 93-1                             | TED        | 102.9                | 1        | Dependent                |
| 82     | 95-1                             | TED        | 131.17               | 1        | Dependent                |
| 83     | 97-1                             | TED        | 26.1                 | 0        | Dependent                |
| 84     | 98-1                             | TED        | 59.93                | 0        | Independent              |
| 85     | 99-1                             | TED        | 83.23                | 0        | Independent              |
| 86     | 100-1                            | TED        | 126.43               | 1        | Dependent                |

| Sl.No. | Unique Patient ID - repeat order | TED status | Time since diagnosis | Censored | Transfusion requirements |
|--------|----------------------------------|------------|----------------------|----------|--------------------------|
| 87     | 101-1                            | NoTED      | 57.6                 | 0        | Independent              |
| 88     | 102-1                            | TED        | 13.53                | 1        | Independent              |
| 89     | 103-1                            | TED        | 67.93                | 1        | Dependent                |
| 90     | 104-1                            | TED        | 128.43               | 0        | Dependent                |
| 91     | 105-1                            | NoTED      | 46.23                | 1        | Dependent                |
| 92     | 106-1                            | TED        | 35.07                | 0        | Dependent                |
| 93     | 107-1                            | TED        | 73.37                | 0        | Independent              |
| 94     | 108-1                            | NoTED      | 60.43                | 1        | Dependent                |
| 95     | 110-1                            | TED        | 18.67                | 1        | Dependent                |
| 96     | 111-1                            | TED        | 78.33                | 0        | Dependent                |
| 97     | 112-1                            | NoTED      | 124.93               | 0        | Dependent                |
| 98     | 113-1                            | TED        | 48                   | 1        | Independent              |
| 99     | 114-1                            | TED        | 63.97                | 1        | Dependent                |
| 100    | 115-1                            | NoTED      | 67.97                | 1        | Dependent                |
| 101    | 116-1                            | TED        | 48.8                 | 0        | Dependent                |
| 102    | 117-1                            | TED        | 187.87               | 1        | Independent              |
| 103    | 118-1                            | NoTED      | 55.77                | 1        | Dependent                |
| 104    | 122-1                            | TED        | 43.17                | 1        | Independent              |
| 105    | 123-1                            | TED        | 36.87                | 0        | Independent              |
| 106    | 124-1                            | TED        | 35.1                 | 1        | Dependent                |
| 107    | 125-1                            | TED        | 4.1                  | 0        | Independent              |
| 108    | 126-1                            | TED        | 40.03                | 0        | Independent              |
| 109    | 128-1                            | TED        | 205.57               | 1        | Independent              |
| 110    | 129-1                            | TED        | 24.63                | 1        | Independent              |
| 111    | 130-1                            | TED        | 36.5                 | 1        | Independent              |
| 112    | 131-1                            | NoTED      | 21.67                | 0        | Dependent                |
| 113    | 133-1                            | TED        | 3.97                 | 0        | Independent              |

Table S9: Patient Characteristics and Association with Median Survival

|                               | N   | %    | Median Survival<br>(months) | (95% CI)      | p-value       |
|-------------------------------|-----|------|-----------------------------|---------------|---------------|
| <b>Age</b>                    |     |      |                             |               |               |
| < 55 yrs.                     | 5   | 4.4  | 70                          | 70.0 to 71.8  | 0.6337        |
| 55-64 yrs.                    | 14  | 10.6 | -                           | -             |               |
| 65-74 yrs.                    | 49  | 43.3 | 81.13                       | 67.9 to 131.1 |               |
| ≥ 75 yrs                      | 45  | 39.8 | 85.6                        | 48.6 to 126.4 |               |
| Total                         | 113 |      |                             |               |               |
| <b>Sex</b>                    |     |      |                             |               |               |
| Female                        | 46  | 40.7 | 85.6                        | 48.8 to 205.5 | 0.9382        |
| Male                          | 67  | 59.3 | 92                          | 69.4 to 126.4 |               |
| Total                         |     |      |                             |               |               |
| <b>WHO 2008</b>               |     |      |                             |               |               |
| RA                            | 9   | 8    | 103                         | 63.1 to 103.0 | <b>0.002</b>  |
| RCMD                          | 11  | 9.8  | -                           | -             |               |
| RARS                          | 59  | 52.6 | 86.7                        | 69.4 to 126.4 |               |
| RAEB-1                        | 15  | 13.3 | 46.2                        | 27.2 to 70.0  |               |
| RAFEB-2                       | 13  | 11.6 | 48.6                        | 28.7 to 205.5 |               |
| RARS-T                        | 5   | 4.4  | -                           | -             |               |
| Total                         | 112 |      |                             |               |               |
| <b>IPSS Risk Categories</b>   |     |      |                             |               |               |
| Low                           | 29  | 32.2 | 131.1                       | 81.1 to 192.4 | <b>0.0154</b> |
| Int-1                         | 44  | 48.8 | 94.9                        | 60.4 to 126.3 |               |
| Int-2                         | 11  | 12.2 | 35.1                        | 25.3 to 70.0  |               |
| high                          | 6   | 6.6  | 25                          | 23.2 to 205.5 |               |
| Total                         | 90  |      |                             |               |               |
| <b>Karyotype (IPSS)</b>       |     |      |                             |               |               |
| Good                          | 70  | 66   | 94.9                        | 76.1 to 131.1 | <b>0.0219</b> |
| intermediate                  | 24  | 22.6 | 67.9                        | 48.6 to 205.5 |               |
| Poor                          | 12  | 11.3 | 43.6                        | 25.3 to 70.0  |               |
| Total                         | 106 |      |                             |               |               |
| <b>IPSS-R Risk Categories</b> |     |      |                             |               |               |
| Very Low                      | 19  | 21.1 | 137.5                       | 81.1 to 137.5 | <b>0.0026</b> |
| Low                           | 32  | 35.5 | 103                         | 85.6 to 187.8 |               |
| Intermediate                  | 21  | 23.3 | 60.4                        | 44.7 to 159.0 |               |
| High                          | 10  | 11.1 | 27.9                        | 23.2 to 97.3  |               |
| Very High                     | 8   | 8.8  | 25.3                        | 19.7 to 205.5 |               |
| Total                         | 90  |      |                             |               |               |
| <b>Karyotype (IPSSR)</b>      |     |      |                             |               |               |
| Very good                     | 3   | 3    | 137.5                       | 21.6 to -     | 0.075         |
| Good                          | 69  | 63   | 94.9                        | 71.1 to 131.1 |               |
| Intermediate                  | 22  | 21   | 63.1                        | 48.6 to 205.5 |               |
| Poor                          | 5   | 4    | 67.9                        | 13.5 to 67.9  |               |
| Very poor                     | 7   | 9    | 43.6                        | 19.7 to 70.0  |               |
| Total                         | 106 |      |                             |               |               |

|                                          | N   | %    | Median Survival<br>(months) | (95% CI)      | p-value       |
|------------------------------------------|-----|------|-----------------------------|---------------|---------------|
| <b>Blast</b>                             |     |      |                             |               |               |
| ≤ 2                                      | 65  | 59.6 | 126.4                       | 89.5 to 192.4 | <b>0.0002</b> |
| 2.1-4.9                                  | 15  | 13.7 | 85.6                        | 42.2 to 131.1 |               |
| 5-10                                     | 19  | 17.4 | 54.4                        | 44.7 to 70.3  |               |
| > 10                                     | 10  | 9.1  | 35.1                        | 25.0 to 205.5 |               |
| Total                                    | 109 |      |                             |               |               |
| <b>Hemoglobin (g/dL)</b>                 |     |      |                             |               |               |
| <8                                       | 13  | 11.9 | 205.5                       | 102.9 to -    | 0.0899        |
| 8-9.9                                    | 48  | 44   | 67.9                        | 54.4 to 97.3  |               |
| ≥ 10                                     | 48  | 44   | 89.5                        | 69.9 to 187.8 |               |
| Total                                    | 109 |      |                             |               |               |
| <b>Absolute Neutrophil Count (109/L)</b> |     |      |                             |               |               |
| < 0.8                                    | 19  | 18.8 | 70                          | 29.0 to 97.3  | 0.2058        |
| ≥ 0.8                                    | 82  | 81.1 | 92                          | 69.9 to 126.4 |               |
| Total                                    | 101 |      |                             |               |               |
| <b>Platelets (109/L)</b>                 |     |      |                             |               |               |
| < 50                                     | 22  | 20.1 | 97.3                        | 35.1 to 187.8 | 0.6999        |
| 50-99                                    | 23  | 21.1 | 81.1                        | 60.4 to 106.7 |               |
| ≥ 100                                    | 64  | 58.8 | 85.6                        | 67.9 to 131.1 |               |
| Total                                    | 109 |      |                             |               |               |
| <b>TED</b>                               |     |      |                             |               |               |
| TED-positive                             | 89  | 78.7 | 103                         | 85.6 to 137.5 | <b>0.0001</b> |
| TED-negative                             | 24  | 21.3 | 55.7                        | 43.6 to 69.4  |               |
| Total                                    | 113 |      |                             |               |               |

Table S10: OS among various IPSS-R categories

| Sl.No. | IPSS-R Category               | Median Survival (months) |        | P value |
|--------|-------------------------------|--------------------------|--------|---------|
|        |                               | TED                      | No TED |         |
| 1      | Very Low, Low, Intermediate   | 126.4                    | 55.7   | <0.0001 |
| 2      | Very Low, Low                 | 126.4                    | 69.9   | 0.0278  |
| 3      | High, Very High               | 48.6                     | 23.2   | 0.0059  |
| 4      | Intermediate, High, Very High | 70.0                     | 29.8   | 0.0062  |

Table S11 Hazard Ratios for death in a univariate analysis

| Factor   | HR   | 95% CI of HR | P       |
|----------|------|--------------|---------|
| TED      | 3.4  | 1.9 to 6.1   | <0.0001 |
| ME Ratio | 3.1  | 1.5 to 6.3   | 0.001   |
| IPSSR    | 1.4  | 1.1 to 1.8   | 0.0006  |
| CEBPA    | 5.1  | 1.2 to 21.7  | 0.0264  |
| CUX1     | 4.1  | 1.5 to 10.8  | 0.0035  |
| IDH2     | 12.2 | 2.5 to 57.9  | 0.0016  |
| NRAS     | 5.3  | 1.6 to 17.6  | 0.0061  |
| RUNX1    | 2.4  | 1.2 to 4.8   | 0.0105  |
| SRSF2    | 3.1  | 1.6 to 6.0   | 0.0005  |
| STAG2    | 4.3  | 1.7 to 11.1  | 0.0021  |



Figure S1

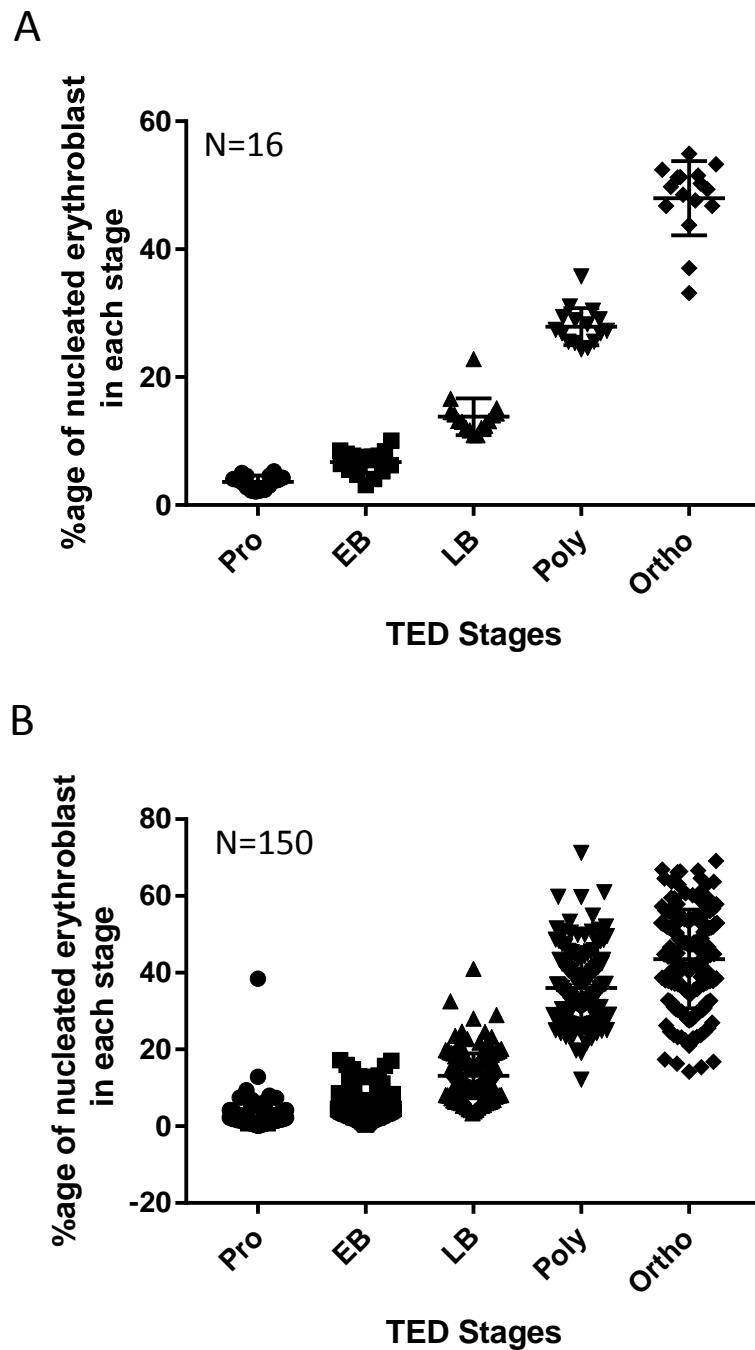

**Figure S1: TED is abnormal in MDS samples:** A scatter plot showing percentage of nucleated erythroid cells in each stage of TED. **A)** normal (n=16), **B)** MDS/MDS-MPN (RARS-T) samples (n=150).

Figure S2

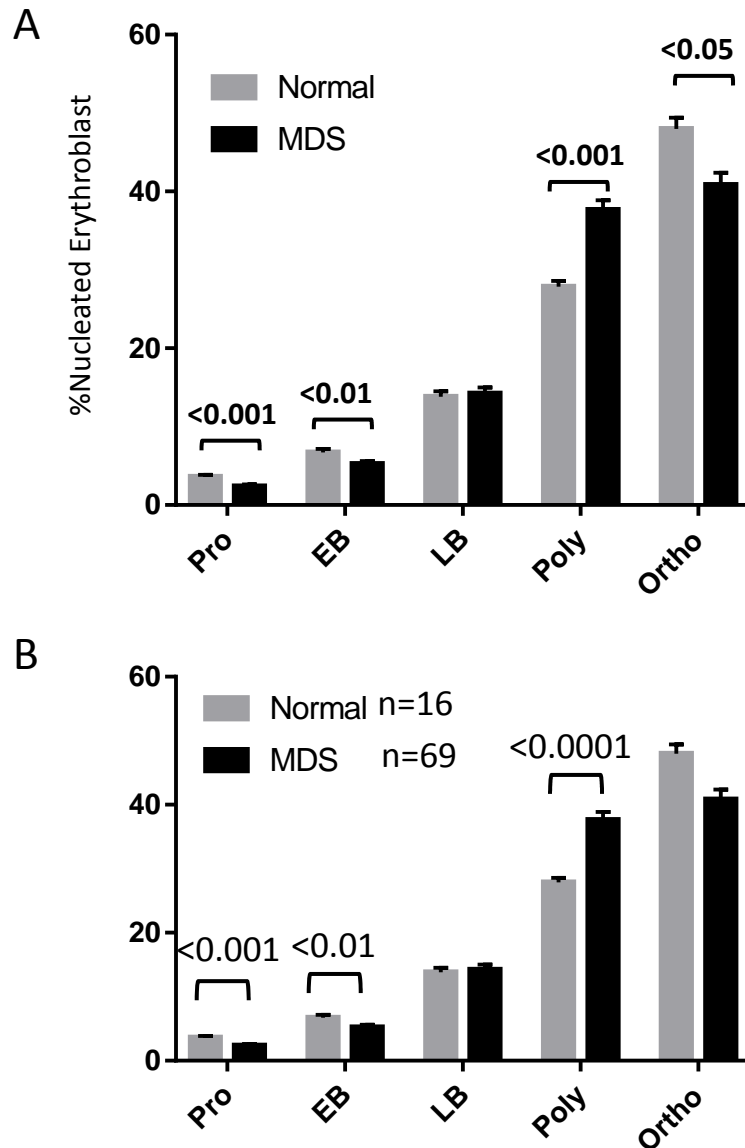

**Figure S2: TED is abnormal in MDS samples:** A bar diagram showing percentage of nucleated erythroid cells in each stage of TED. **A)** When compared to normal (n=16), MDS samples (n=85) were characterized by a significant decrease in percentage of cells in Pro and EB stages and a significantly abnormal increase of cells in poly stage, and a decrease in ortho stage. **B)** A subset of MDS patients (n=69), after removing inconsistent TED on repeat sampling at other times, was compared with normal. We observed a significant decrease in percentage of cells in Pro and EB stages and a significantly abnormal increase of cells in poly stage. Data in bar diagram is presented as mean+S.E.M. Each TED stage was compared between normal and MDS samples using unpaired, two-tailed, non-parametric t-test (Mann Whitney).

Figure S3

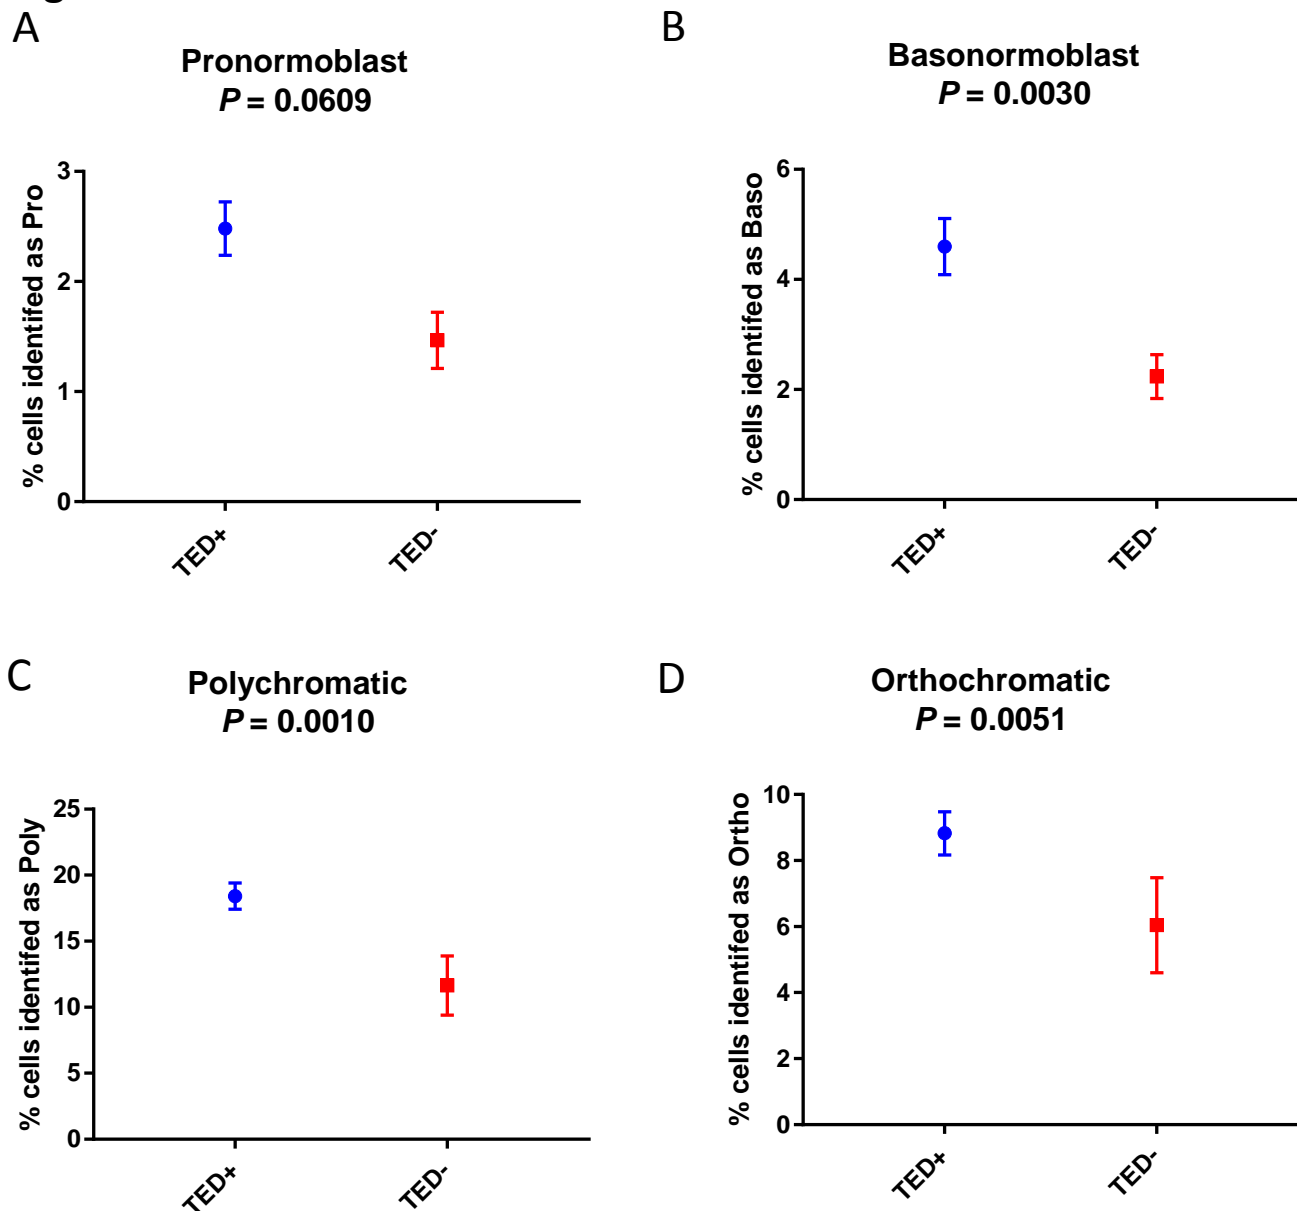

**Figure S3:** Percentage of various erythroid lineage cells from morphologic criteria used by pathologist, pronormoblast (A), basonormoblast (B), polychromatic (C), and orthochromatic (D), undergoing terminal erythroid differentiation, as identified based on their morphology and reported in the manual differential count by pathologist, were analyzed using two-tailed unpaired Mann-Whitney test. There was significant different with all the four cells types low in TED-negative (n=17) group compared to TED-positive (n=85).

**Figure S4**

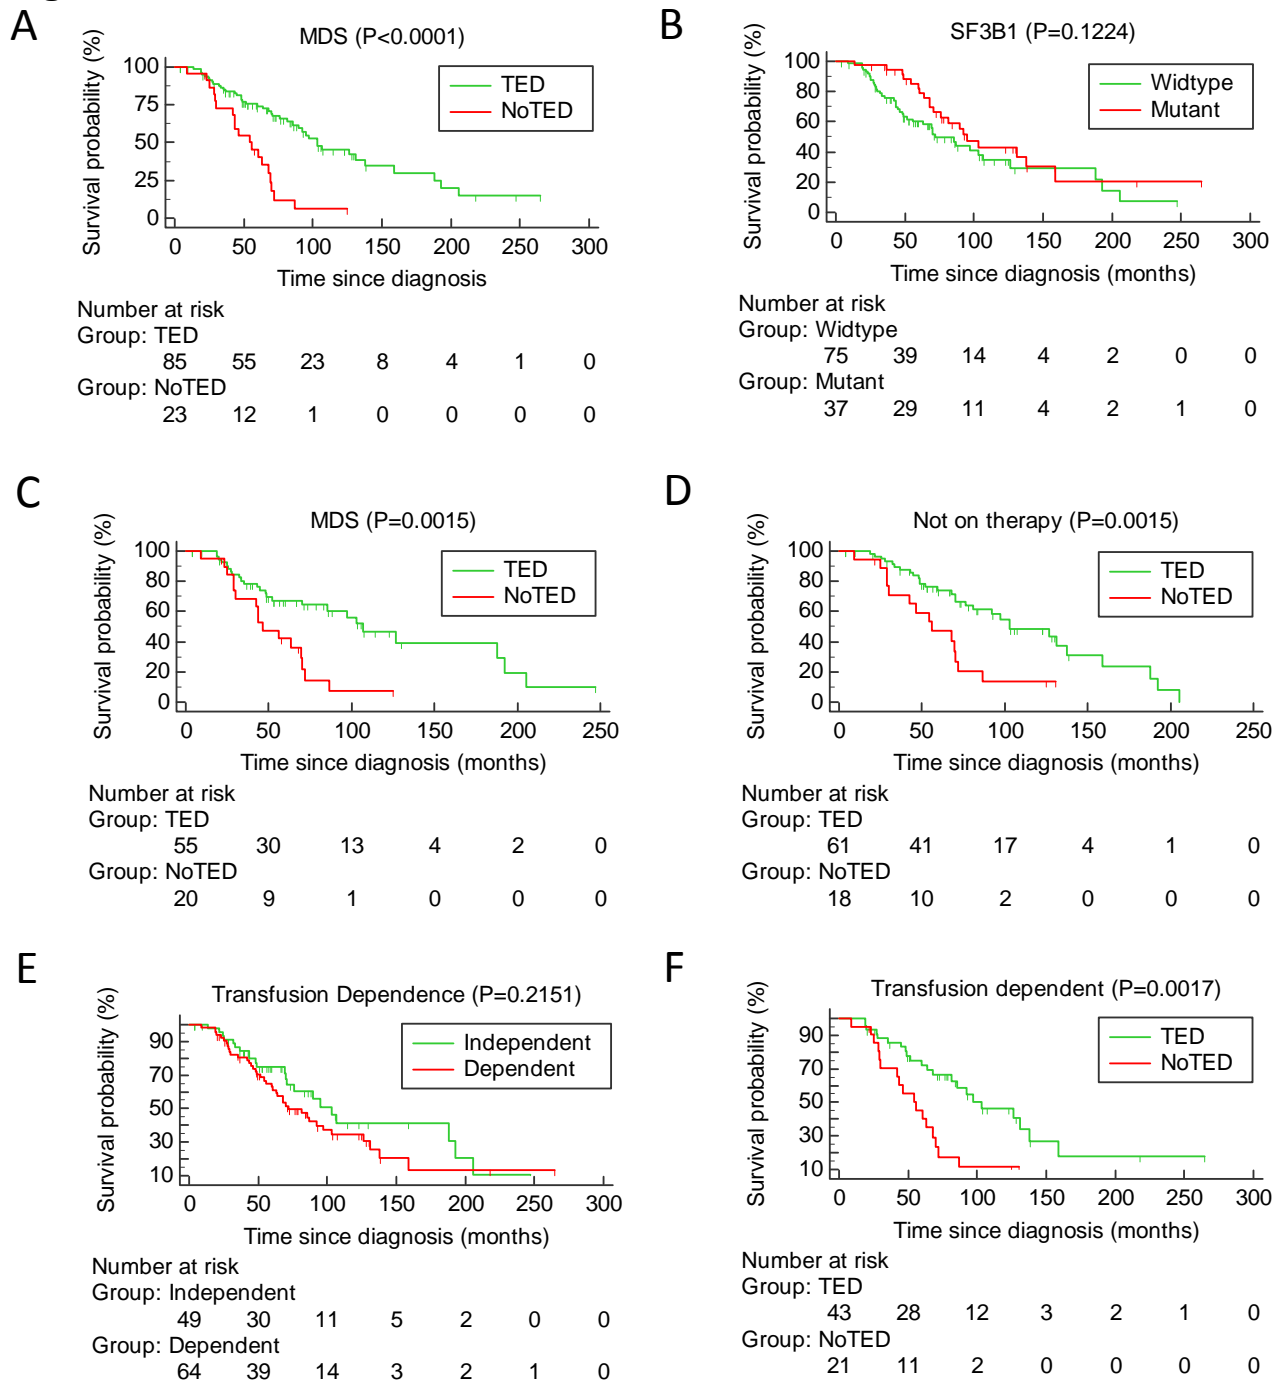

**Figure S4:** Kaplan-Meier survival curves were generated to calculate overall survival (OS). Log-rank test was used to compare the curves. The tables below the curves indicate the number of patients at risk in each group. **A)** There was a significant difference in OS between TED and NoTED MDS patients excluding RARS-T ( $P < 0.0001$ ). **B)** OS was different, mutant showing better survival than wildtype, but the difference was not significant ( $P = 0.1224$ ). **C)** There was a significant difference in OS between TED and NoTED MDS patients excluding SF3B1 mutated patients ( $P = 0.0015$ ). **D)** We also found a difference in OS between patient who were not on any therapy at sample collection ( $P = 0.0015$ ). **E)** OS was different between transfusion dependent and independent patients but it was not significant ( $P = 0.2151$ ), **F)** OS was significantly different between TED and noTED patients who were transfusion dependent at sample collection ( $P = 0.0017$ ).

Figure S5

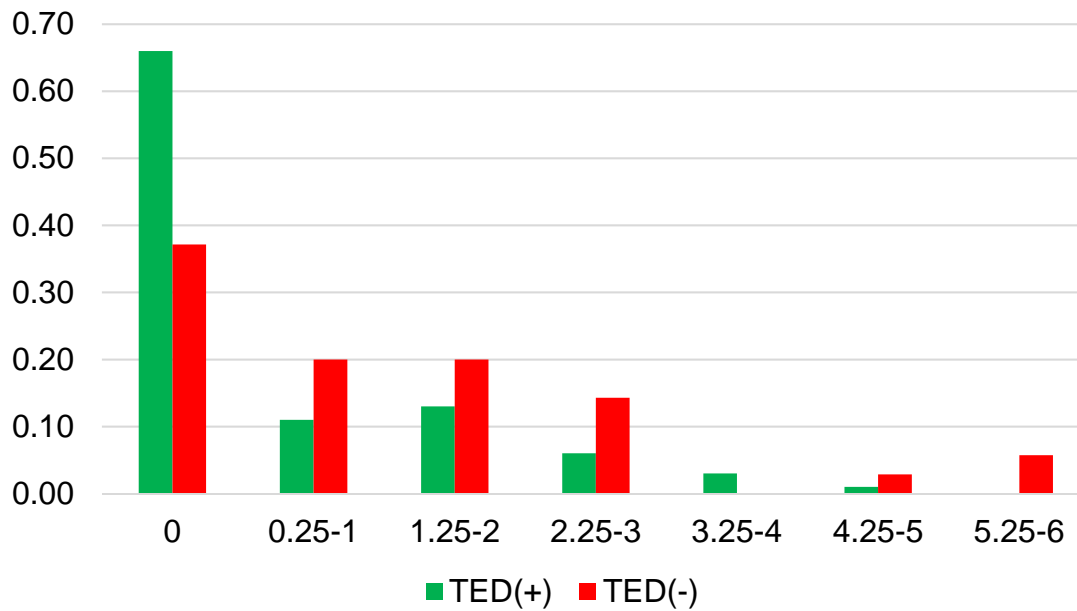

**Figure S5:** Transfusion rate (units/month) between TED and noTED patients. Twice as many patients who were TED-negative were transfusion dependent compared to TED-positive. Also, the transfusion requirements of TED-negative patients were more than TED-positive.
